# Supplementary material for: Synthesis and structure of the first discrete dinuclear cationic aluminum complexes
Source: Royal Society of Chemistry journal article supplement (doi:10.1039/c6dt02360f), 2016-01-01
Supplement: c6dt02360f1.pdf [file c6dt02360f1.pdf]

Supporting Information for

**Synthesis and Structure of Dinuclear Cationic Aluminum Complexes**

Xinbgao Wang, Vincent Dorcet, Yi Luo, Jean-Francois Carpentier and Evgueni Kirillov

- Figure S1.**  $^1\text{H}$  NMR spectrum of  $[\mathbf{2a}]^+[\text{MeB}(\text{C}_6\text{F}_5)_3]^-$ .
- Figure S2.**  $^1\text{H}$  NMR spectrum of  $[\mathbf{2a}]^+[\text{MeB}(\text{C}_6\text{F}_5)_3]^-$ .
- Figure S3.**  $^{13}\text{C}\{^1\text{H}\}$  NMR spectrum of  $[\mathbf{2a}]^+[\text{MeB}(\text{C}_6\text{F}_5)_3]^-$ .
- Figure S4.**  $^{19}\text{F}\{^1\text{H}\}$  NMR spectrum of  $[\mathbf{2a}]^+[\text{MeB}(\text{C}_6\text{F}_5)_3]^-$ .
- Figure S5.**  $^{11}\text{B}\{^1\text{H}\}$  NMR spectrum of  $[\mathbf{2a}]^+[\text{MeB}(\text{C}_6\text{F}_5)_3]^-$ .
- Figure S6.** Variable-temperature  $^1\text{H}$  NMR spectrum of  $[\mathbf{2a}]^+[\text{MeB}(\text{C}_6\text{F}_5)_3]^-$ .
- Figure S7.**  $^1\text{H}$  NMR spectrum of  $[\mathbf{2b}]^+[\text{MeB}(\text{C}_6\text{F}_5)_3]^-$ .
- Figure S8.**  $^{13}\text{C}\{^1\text{H}\}$  NMR spectrum of  $[\mathbf{2b}]^+[\text{MeB}(\text{C}_6\text{F}_5)_3]^-$ .
- Figure S9.**  $^{19}\text{F}\{^1\text{H}\}$  NMR spectrum of  $[\mathbf{2b}]^+[\text{MeB}(\text{C}_6\text{F}_5)_3]^-$ .
- Figure S10.**  $^{11}\text{B}\{^1\text{H}\}$  NMR spectrum of  $[\mathbf{2b}]^+[\text{MeB}(\text{C}_6\text{F}_5)_3]^-$ .
- Figure S11.**  $^1\text{H}$  NMR spectrum of  $[\mathbf{3a}\cdot(\text{OEt}_2)_2]^{2+}[\text{MeB}(\text{C}_6\text{F}_5)_3]^-[\text{H}_2\text{N}\{\text{B}(\text{C}_6\text{F}_5)_3\}_2]^-$ .
- Figure S12.**  $^{13}\text{C}\{^1\text{H}\}$  NMR spectrum of  $[\mathbf{3a}\cdot(\text{OEt}_2)_2]^{2+}[\text{MeB}(\text{C}_6\text{F}_5)_3]^-[\text{H}_2\text{N}\{\text{B}(\text{C}_6\text{F}_5)_3\}_2]^-$ .
- Figure S13.**  $^{19}\text{F}\{^1\text{H}\}$  NMR spectrum of  $[\mathbf{3a}\cdot(\text{OEt}_2)_2]^{2+}[\text{MeB}(\text{C}_6\text{F}_5)_3]^-[\text{H}_2\text{N}\{\text{B}(\text{C}_6\text{F}_5)_3\}_2]^-$ .
- Figure S14.**  $^{11}\text{B}\{^1\text{H}\}$  NMR spectrum of  $[\mathbf{3a}\cdot(\text{OEt}_2)_2]^{2+}[\text{MeB}(\text{C}_6\text{F}_5)_3]^-[\text{H}_2\text{N}\{\text{B}(\text{C}_6\text{F}_5)_3\}_2]^-$ .
- Figure S15.**  $^1\text{H}$  NMR spectrum of  $[\mathbf{3b}\cdot(\text{OEt}_2)_2]^{2+}[\text{MeB}(\text{C}_6\text{F}_5)_3]^-[\text{H}_2\text{N}\{\text{B}(\text{C}_6\text{F}_5)_3\}_2]^-$ .
- Figure S16.**  $^{13}\text{C}\{^1\text{H}\}$  NMR spectrum of  $[\mathbf{3b}\cdot(\text{OEt}_2)_2]^{2+}[\text{MeB}(\text{C}_6\text{F}_5)_3]^-[\text{H}_2\text{N}\{\text{B}(\text{C}_6\text{F}_5)_3\}_2]^-$ .
- Figure S17.**  $^{19}\text{F}\{^1\text{H}\}$  NMR spectrum of  $[\mathbf{3b}\cdot(\text{OEt}_2)_2]^{2+}[\text{MeB}(\text{C}_6\text{F}_5)_3]^-[\text{H}_2\text{N}\{\text{B}(\text{C}_6\text{F}_5)_3\}_2]^-$ .
- Figure S18.**  $^{11}\text{B}\{^1\text{H}\}$  NMR spectrum of  $[\mathbf{3b}\cdot(\text{OEt}_2)_2]^{2+}[\text{MeB}(\text{C}_6\text{F}_5)_3]^-[\text{H}_2\text{N}\{\text{B}(\text{C}_6\text{F}_5)_3\}_2]^-$ .
- Figure S19.**  $^1\text{H}$  NMR spectrum of  $[\mathbf{3a}\cdot(\text{OEt}_2)_2]^{2+}[\text{H}_2\text{N}\{\text{B}(\text{C}_6\text{F}_5)_3\}_2]^-$ .
- Figure S20.**  $^{13}\text{C}\{^1\text{H}\}$  NMR spectrum of  $[\mathbf{3a}\cdot(\text{OEt}_2)_2]^{2+}[\text{H}_2\text{N}\{\text{B}(\text{C}_6\text{F}_5)_3\}_2]^-$ .
- Figure S21.**  $^{19}\text{F}\{^1\text{H}\}$  NMR spectrum of  $[\mathbf{3a}\cdot(\text{OEt}_2)_2]^{2+}[\text{H}_2\text{N}\{\text{B}(\text{C}_6\text{F}_5)_3\}_2]^-$ .
- Figure S22.**  $^{11}\text{B}\{^1\text{H}\}$  NMR spectrum of  $[\mathbf{3a}\cdot(\text{OEt}_2)_2]^{2+}[\text{H}_2\text{N}\{\text{B}(\text{C}_6\text{F}_5)_3\}_2]^-$ .
- Figure S23.**  $^1\text{H}$  NMR spectrum of  $[\mathbf{3b}\cdot(\text{OEt}_2)_2]^{2+}[\text{H}_2\text{N}\{\text{B}(\text{C}_6\text{F}_5)_3\}_2]^-$ .
- Figure S24.**  $^{13}\text{C}\{^1\text{H}\}$  NMR spectrum of  $[\mathbf{3b}\cdot(\text{OEt}_2)_2]^{2+}[\text{H}_2\text{N}\{\text{B}(\text{C}_6\text{F}_5)_3\}_2]^-$ .
- Figure S25.**  $^{19}\text{F}\{^1\text{H}\}$  NMR spectrum of  $[\mathbf{3b}\cdot(\text{OEt}_2)_2]^{2+}[\text{H}_2\text{N}\{\text{B}(\text{C}_6\text{F}_5)_3\}_2]^-$ .
- Figure S26.**  $^{11}\text{B}\{^1\text{H}\}$  NMR spectrum of  $[\mathbf{3b}\cdot(\text{OEt}_2)_2]^{2+}[\text{H}_2\text{N}\{\text{B}(\text{C}_6\text{F}_5)_3\}_2]^-$ .
- Table S1.** Summary of Crystal and Refinement Data for Complexes **4a** and  $[\mathbf{3b}\cdot(\text{OEt}_2)_2]^{2+}[\text{H}_2\text{N}\{\text{B}(\text{C}_6\text{F}_5)_3\}_2]^-$ .

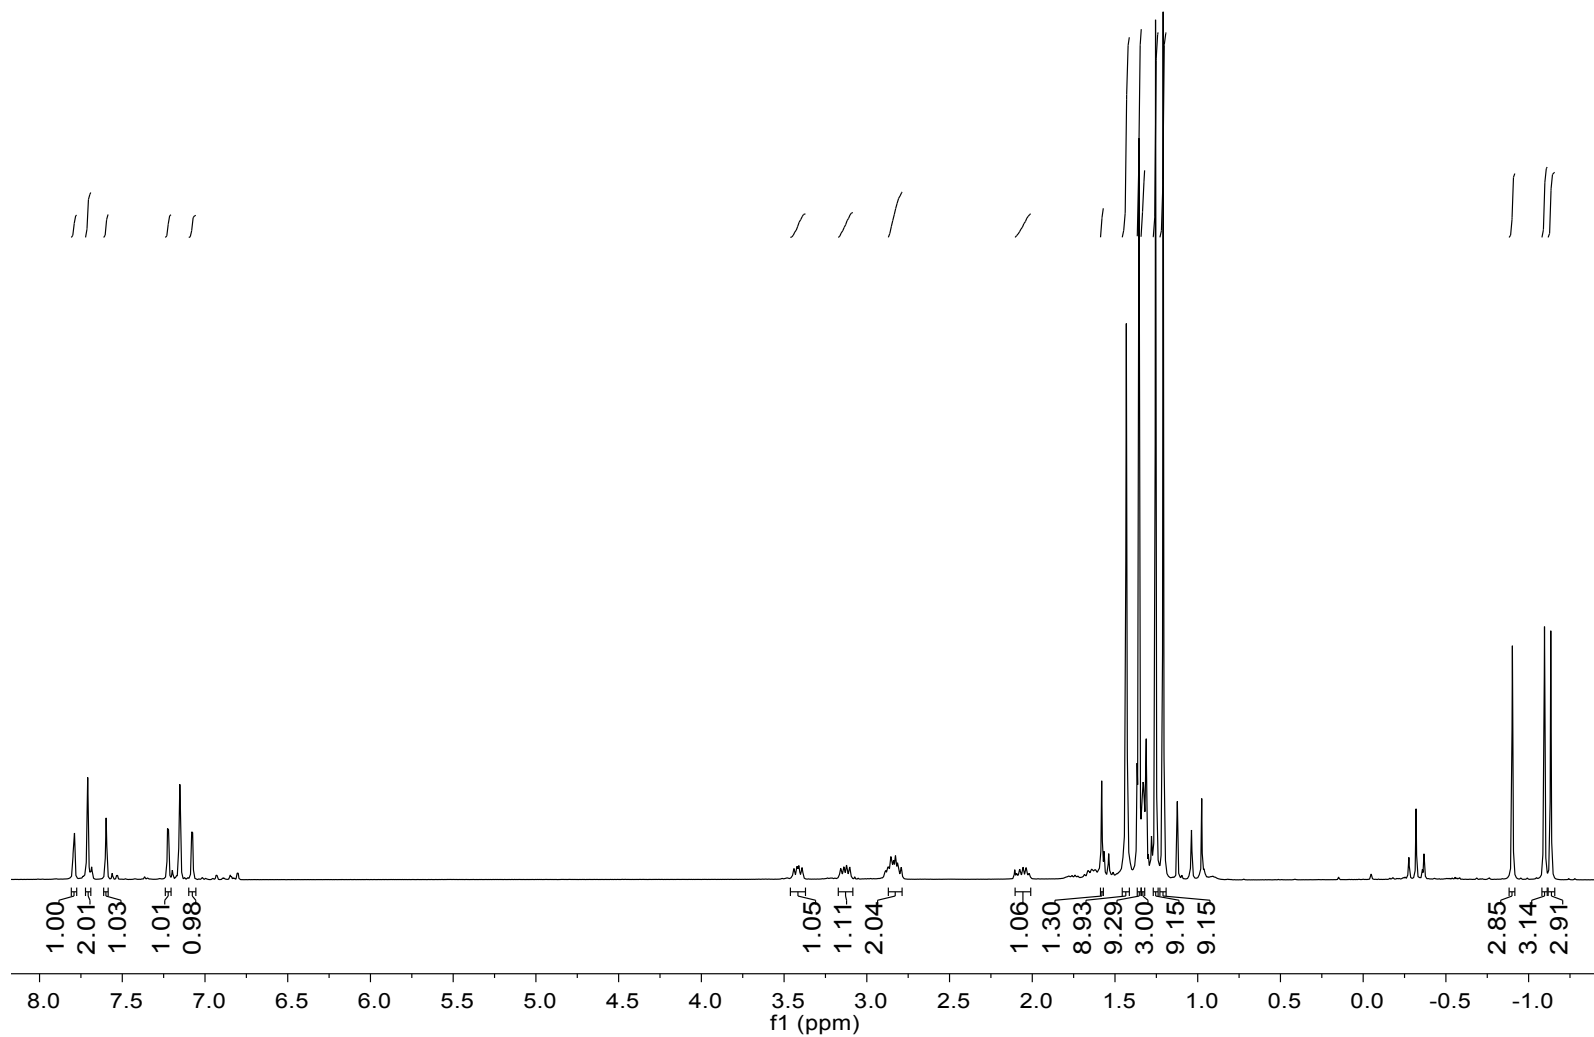

**Figure S1.**  $^1\text{H}$  NMR spectrum (400 MHz,  $\text{C}_6\text{D}_6$ , 298 K) of  $[\mathbf{2a}]^+[\text{MeB}(\text{C}_6\text{F}_5)_3]^-$ .

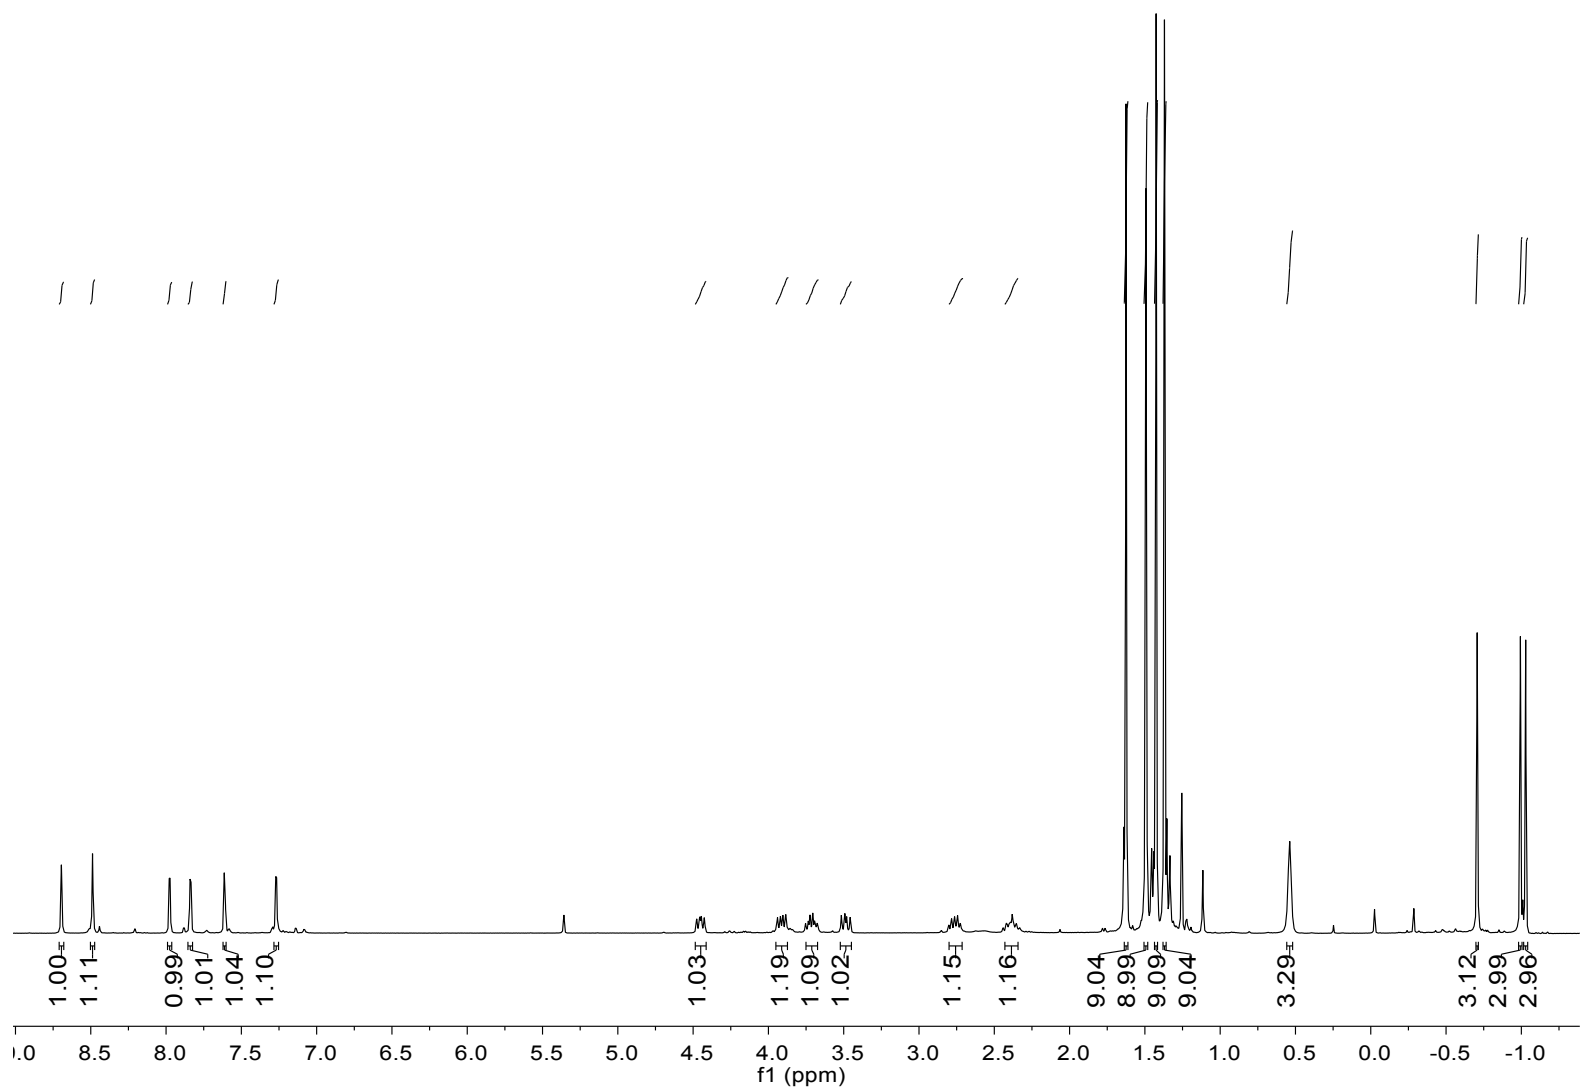

**Figure S2.**  $^1\text{H}$  NMR spectrum (400 MHz,  $\text{CD}_2\text{Cl}_2$ , 298 K) of  $[\mathbf{2a}]^+[\text{MeB}(\text{C}_6\text{F}_5)_3]^-$ .

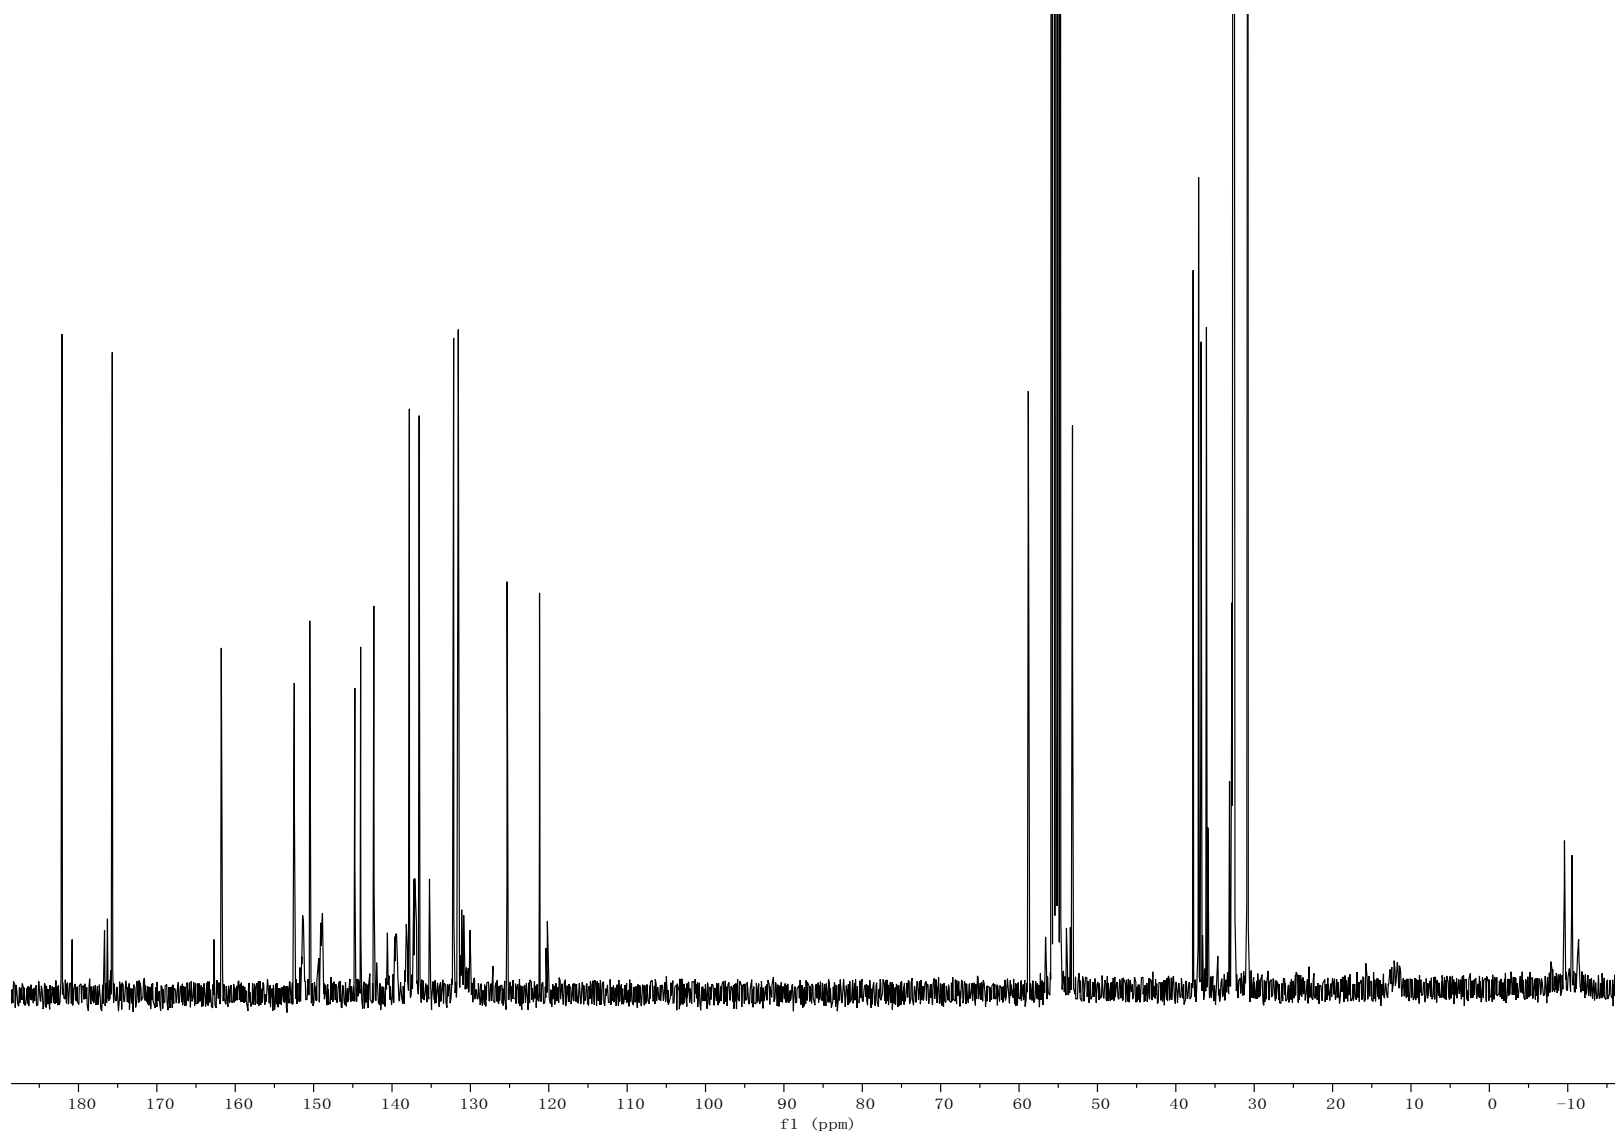

**Figure S3.**  $^{13}\text{C}\{^1\text{H}\}$  NMR spectrum (100 MHz,  $\text{CD}_2\text{Cl}_2$ , 298 K) of  $[\mathbf{2a}]^+[\text{MeB}(\text{C}_6\text{F}_5)_3]^-$ .

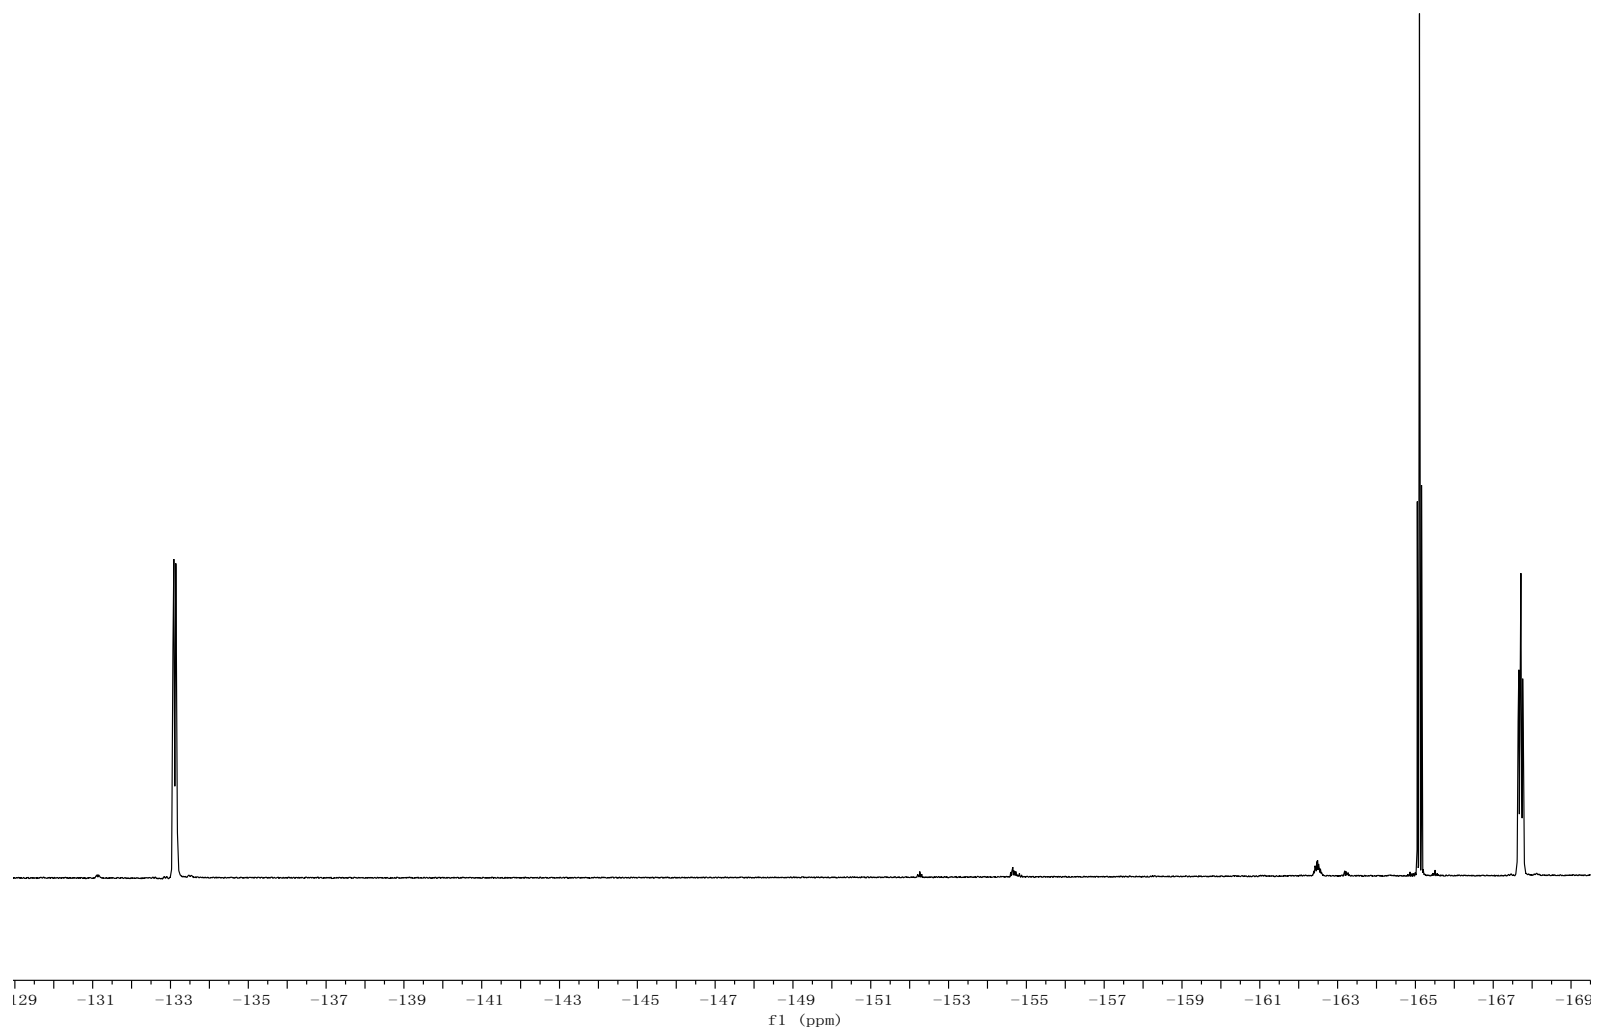

**Figure S4.**  $^{19}\text{F}\{^1\text{H}\}$  NMR spectrum (376 MHz,  $\text{CD}_2\text{Cl}_2$ , 298 K) of  $[\mathbf{2a}]^+[\text{MeB}(\text{C}_6\text{F}_5)_3]^-$ .

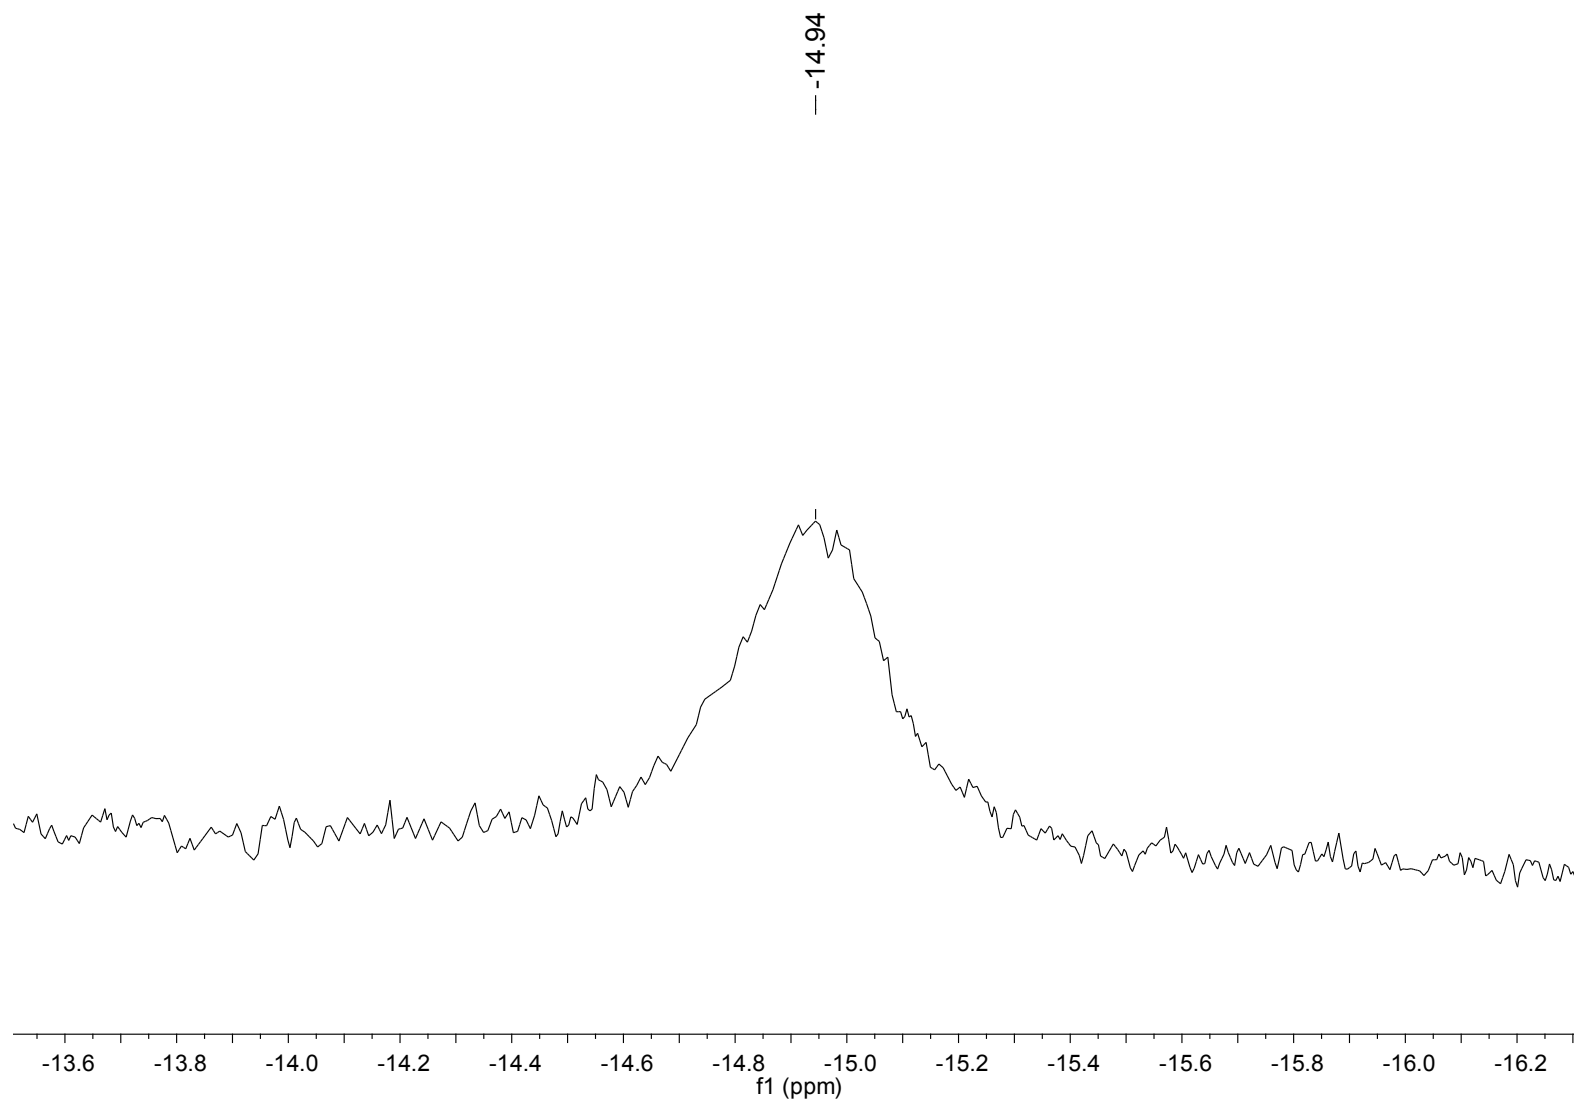

**Figure S5.**  $^{11}\text{B}\{^1\text{H}\}$  NMR spectrum (128 MHz,  $\text{CD}_2\text{Cl}_2$ , 298 K) of  $[\mathbf{2a}]^+[\text{MeB}(\text{C}_6\text{F}_5)_3]^-$ .

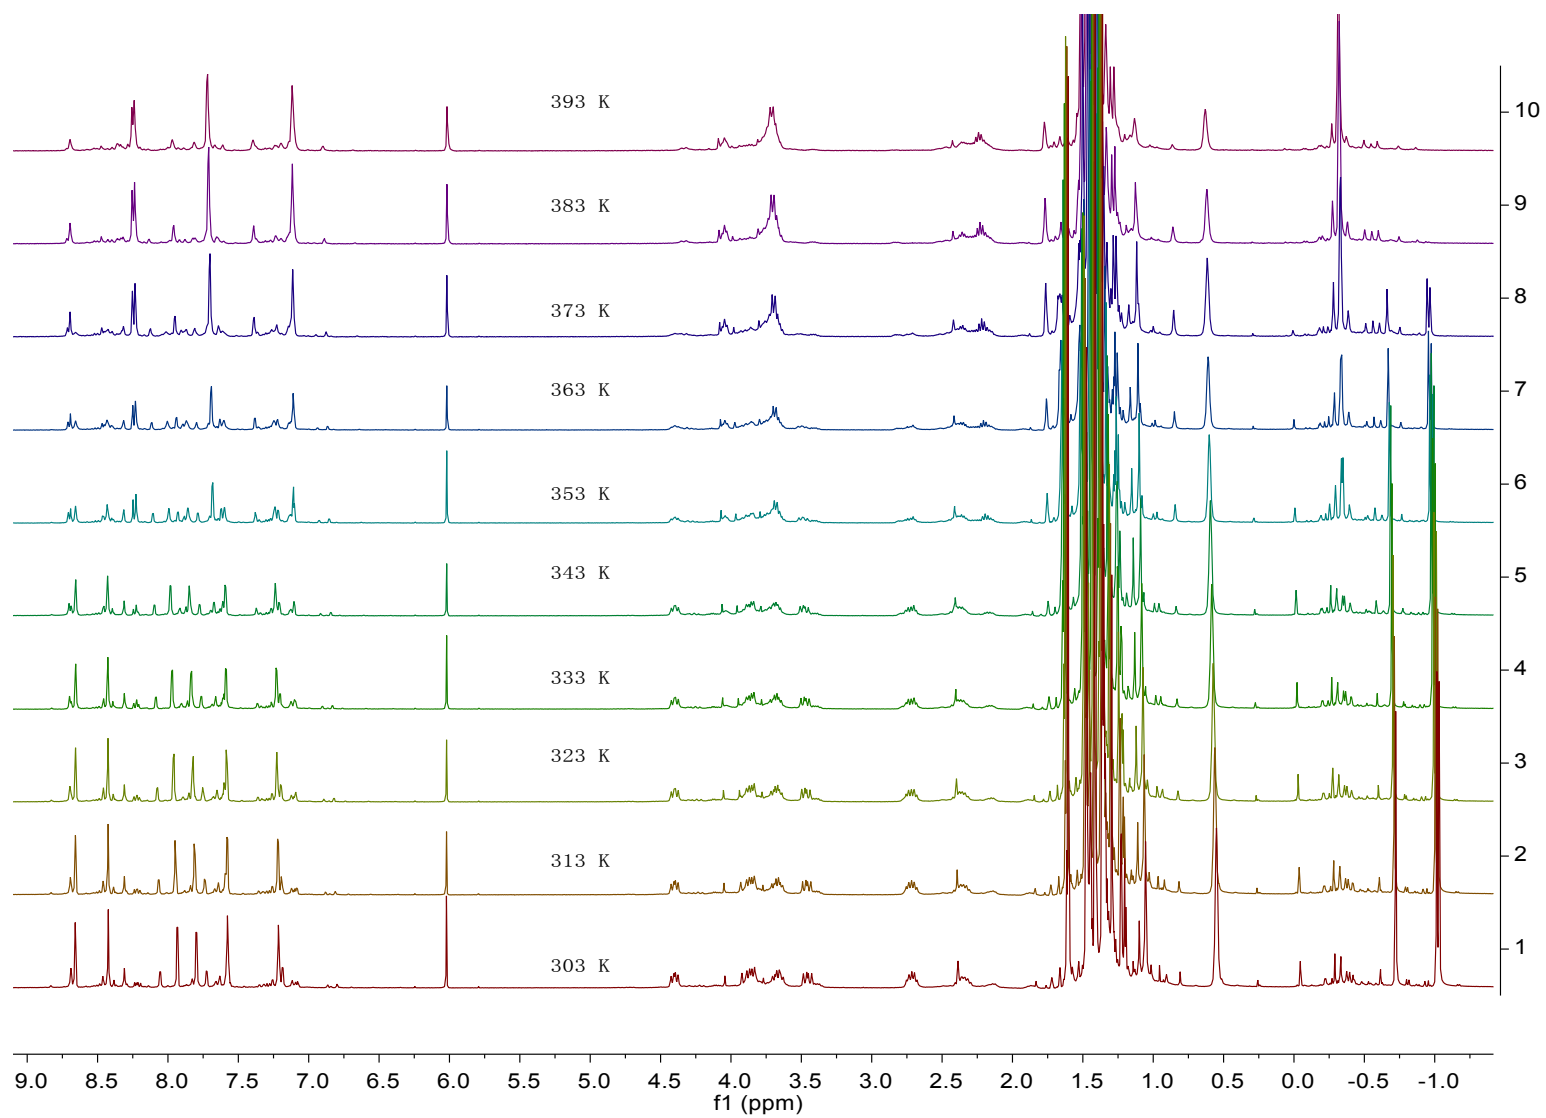

**Figure S6.** Variable-temperature  $^1\text{H}$  NMR spectrum (400 MHz,  $\text{C}_2\text{D}_2\text{Cl}_4$ ) of  $[\mathbf{2a}]^+[\text{MeB}(\text{C}_6\text{F}_5)_3]^-$ .

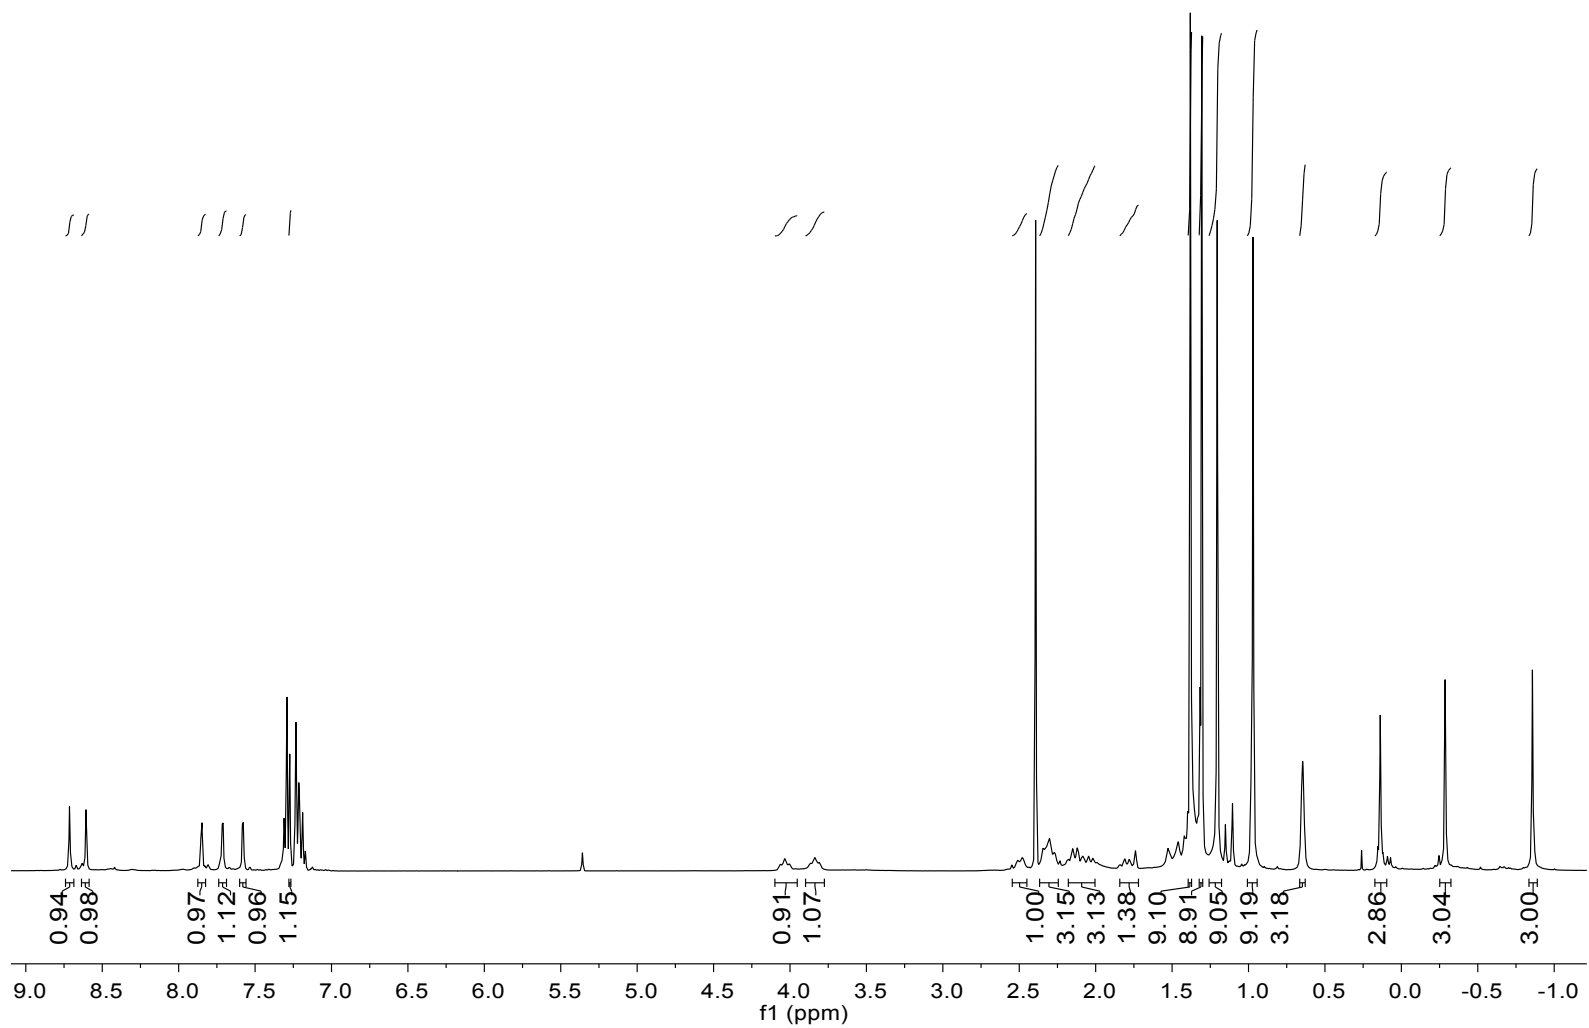

**Figure S7.**  $^1\text{H}$  NMR spectrum (400 MHz,  $\text{CD}_2\text{Cl}_2$ , 298 K) of  $[\mathbf{2b}]^+[\text{MeB}(\text{C}_6\text{F}_5)_3]^-$ .



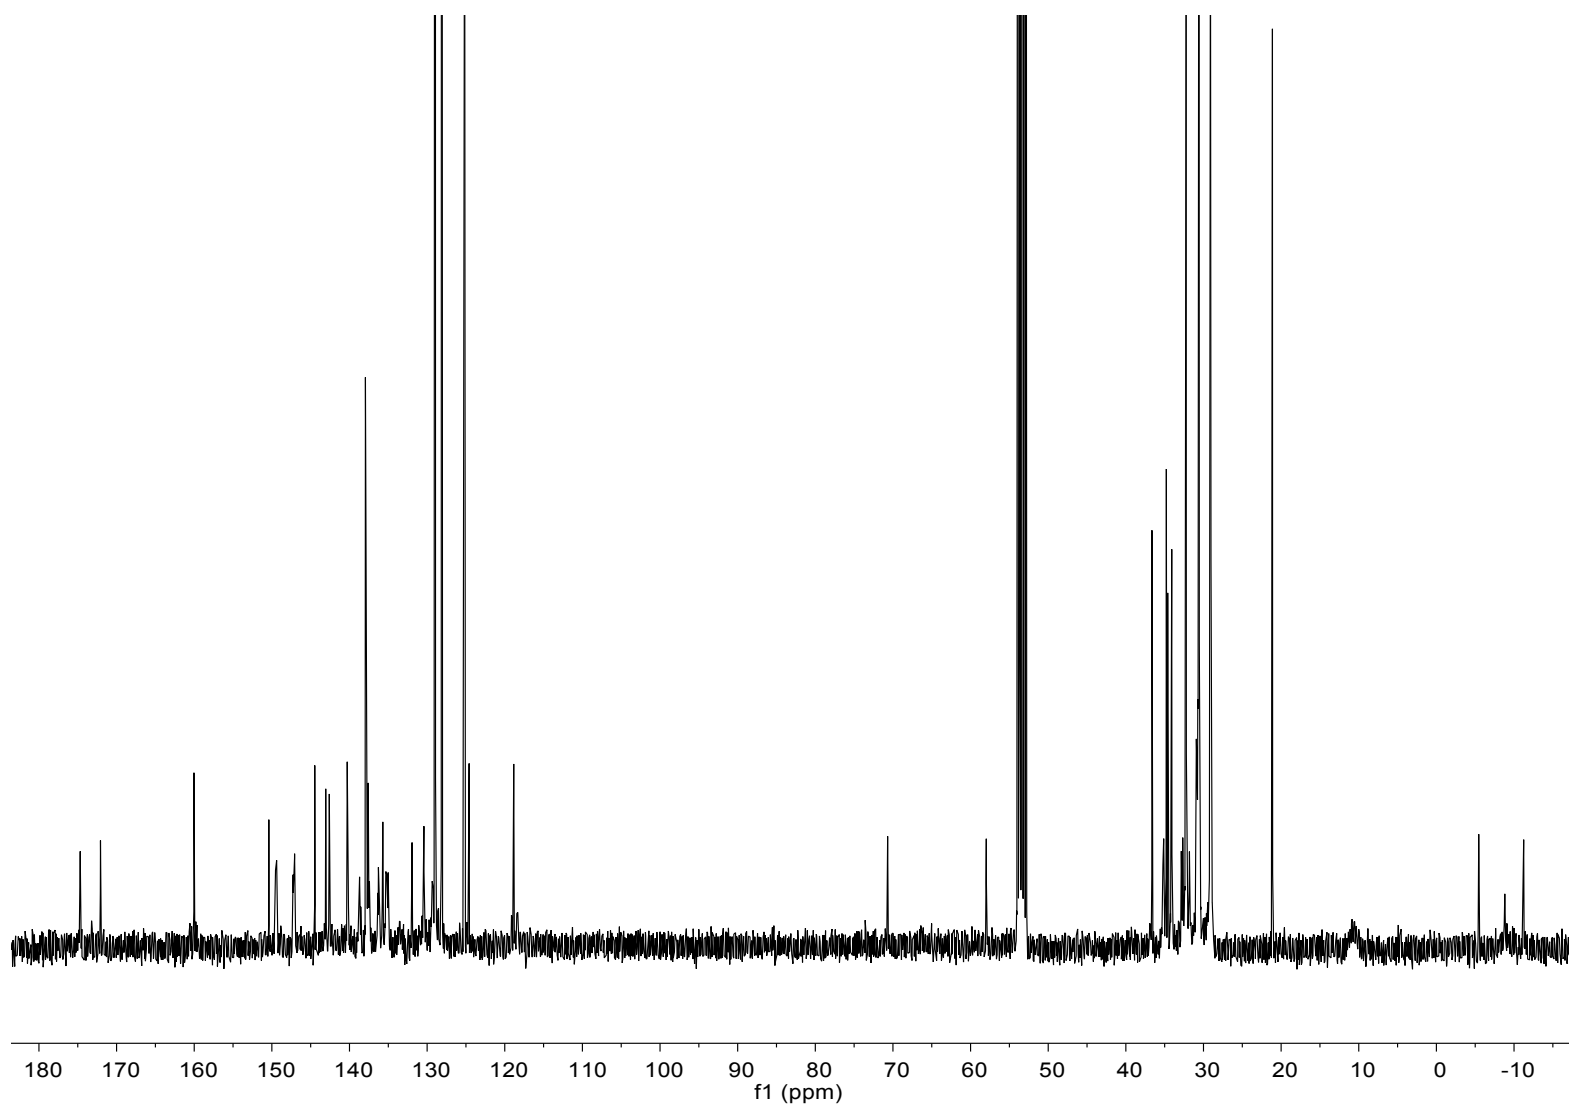

**Figure S8.**  $^{13}\text{C}\{^1\text{H}\}$  NMR spectrum (100 MHz,  $\text{CD}_2\text{Cl}_2$ , 298 K) of  $[\mathbf{2b}]^+[\text{MeB}(\text{C}_6\text{F}_5)_3]^-$ .

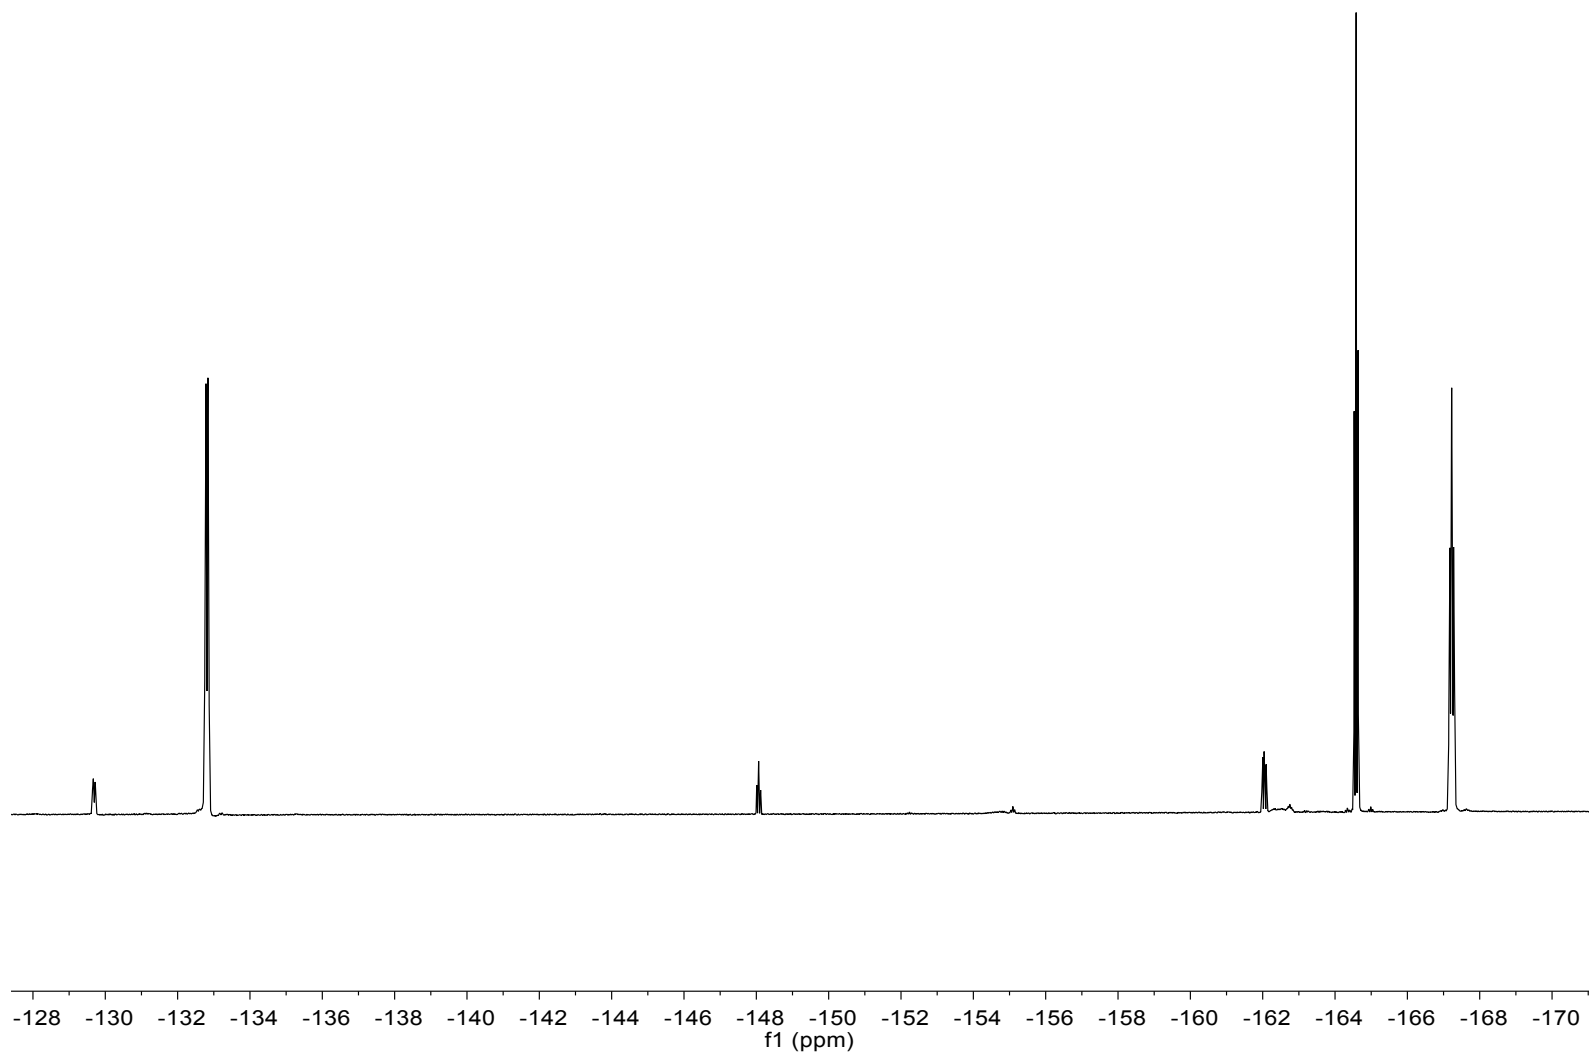

**Figure S9.**  $^{19}\text{F}\{^1\text{H}\}$  NMR spectrum (376 MHz,  $\text{CD}_2\text{Cl}_2$ , 298 K) of  $[\mathbf{2b}]^+[\text{MeB}(\text{C}_6\text{F}_5)_3]^-$ .

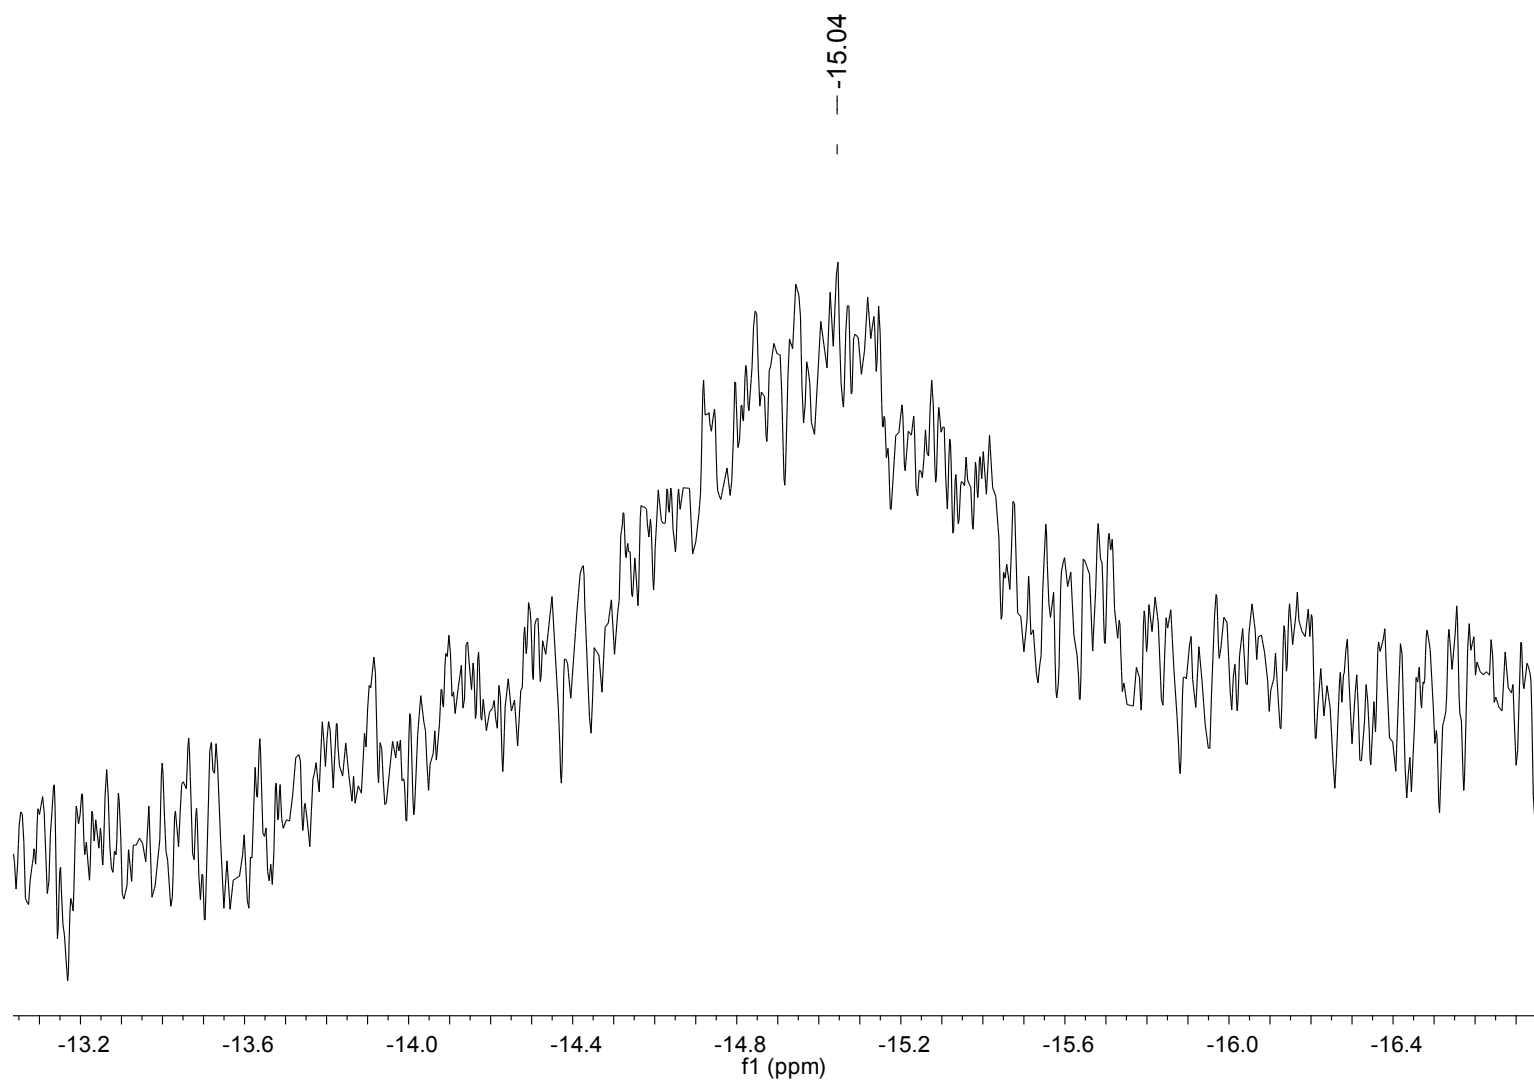

**Figure S10.**  $^{11}\text{B}\{^1\text{H}\}$  NMR spectrum (128 MHz,  $\text{CD}_2\text{Cl}_2$ , 298 K) of  $[\mathbf{2b}]^+[\text{MeB}(\text{C}_6\text{F}_5)_3]^-$ .

M1-EKXB-100-5. 1. fid  
H1

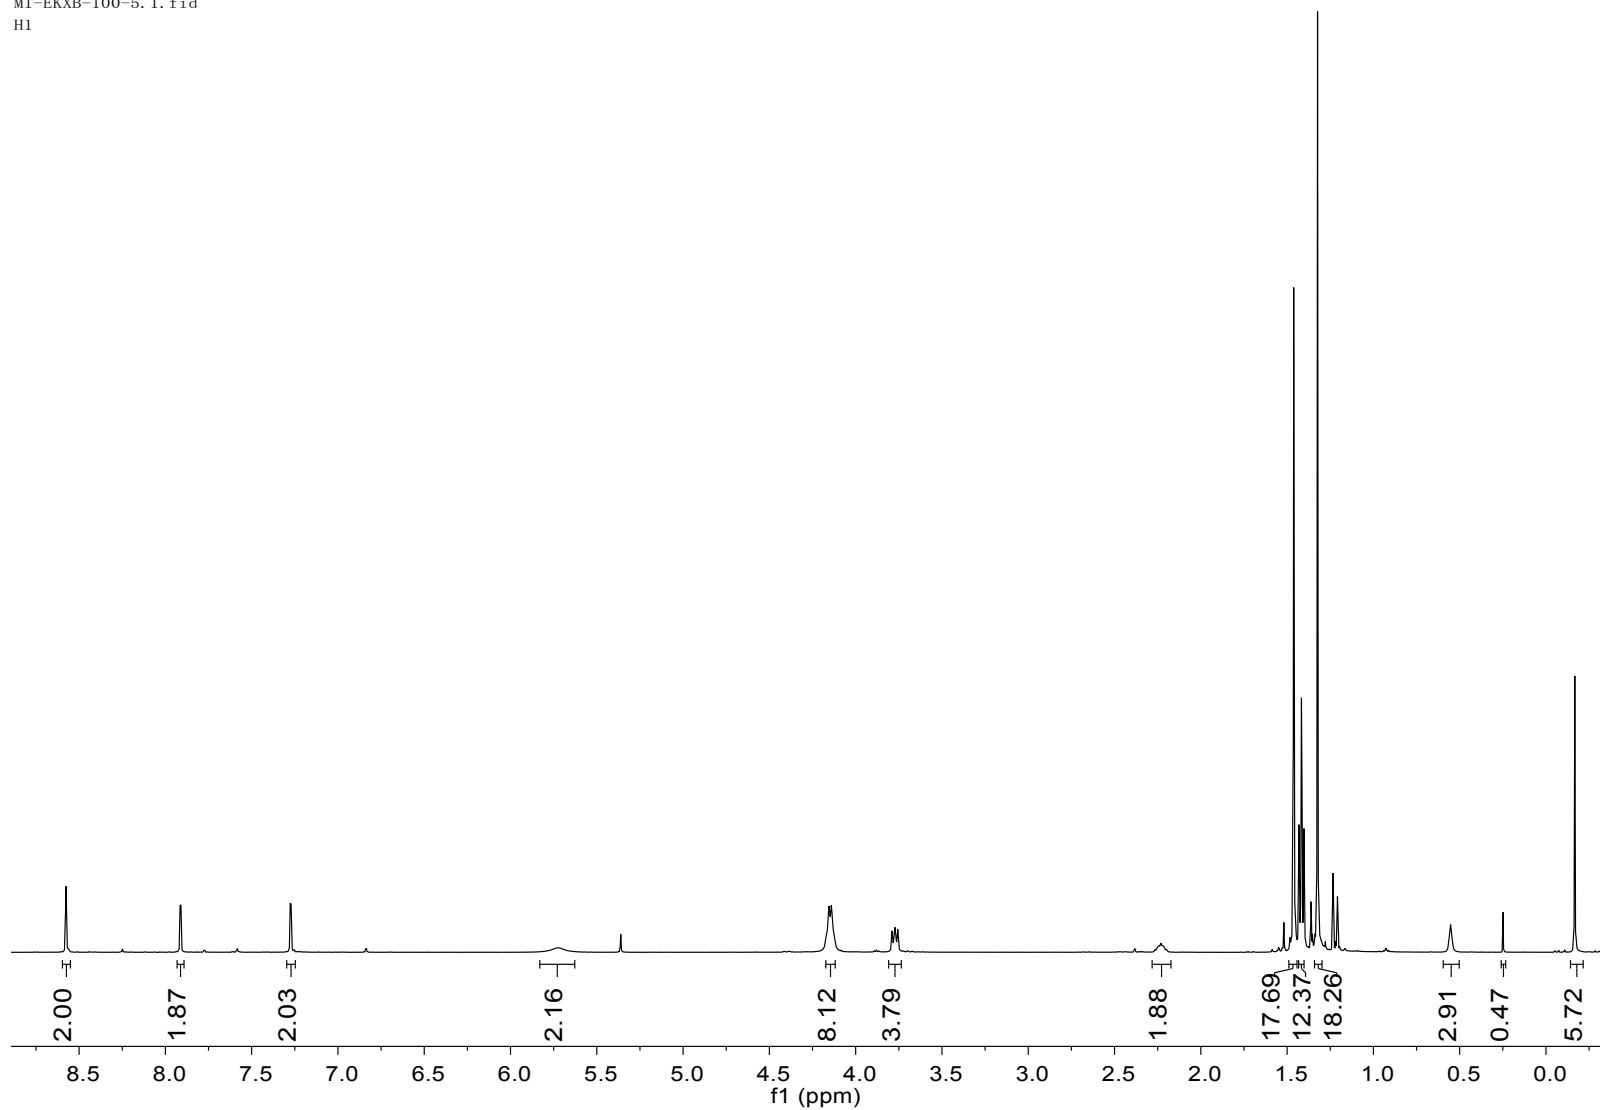

**Figure S11.** <sup>1</sup>H NMR spectrum (500 MHz, CD<sub>2</sub>Cl<sub>2</sub>, 298 K) of [3a·(OEt<sub>2</sub>)<sub>2</sub>]<sup>2+</sup>[(Me)B(C<sub>6</sub>F<sub>5</sub>)<sub>3</sub>]<sup>-</sup>[H<sub>2</sub>N{B(C<sub>6</sub>F<sub>5</sub>)<sub>3</sub>}<sub>2</sub>]<sup>-</sup>.

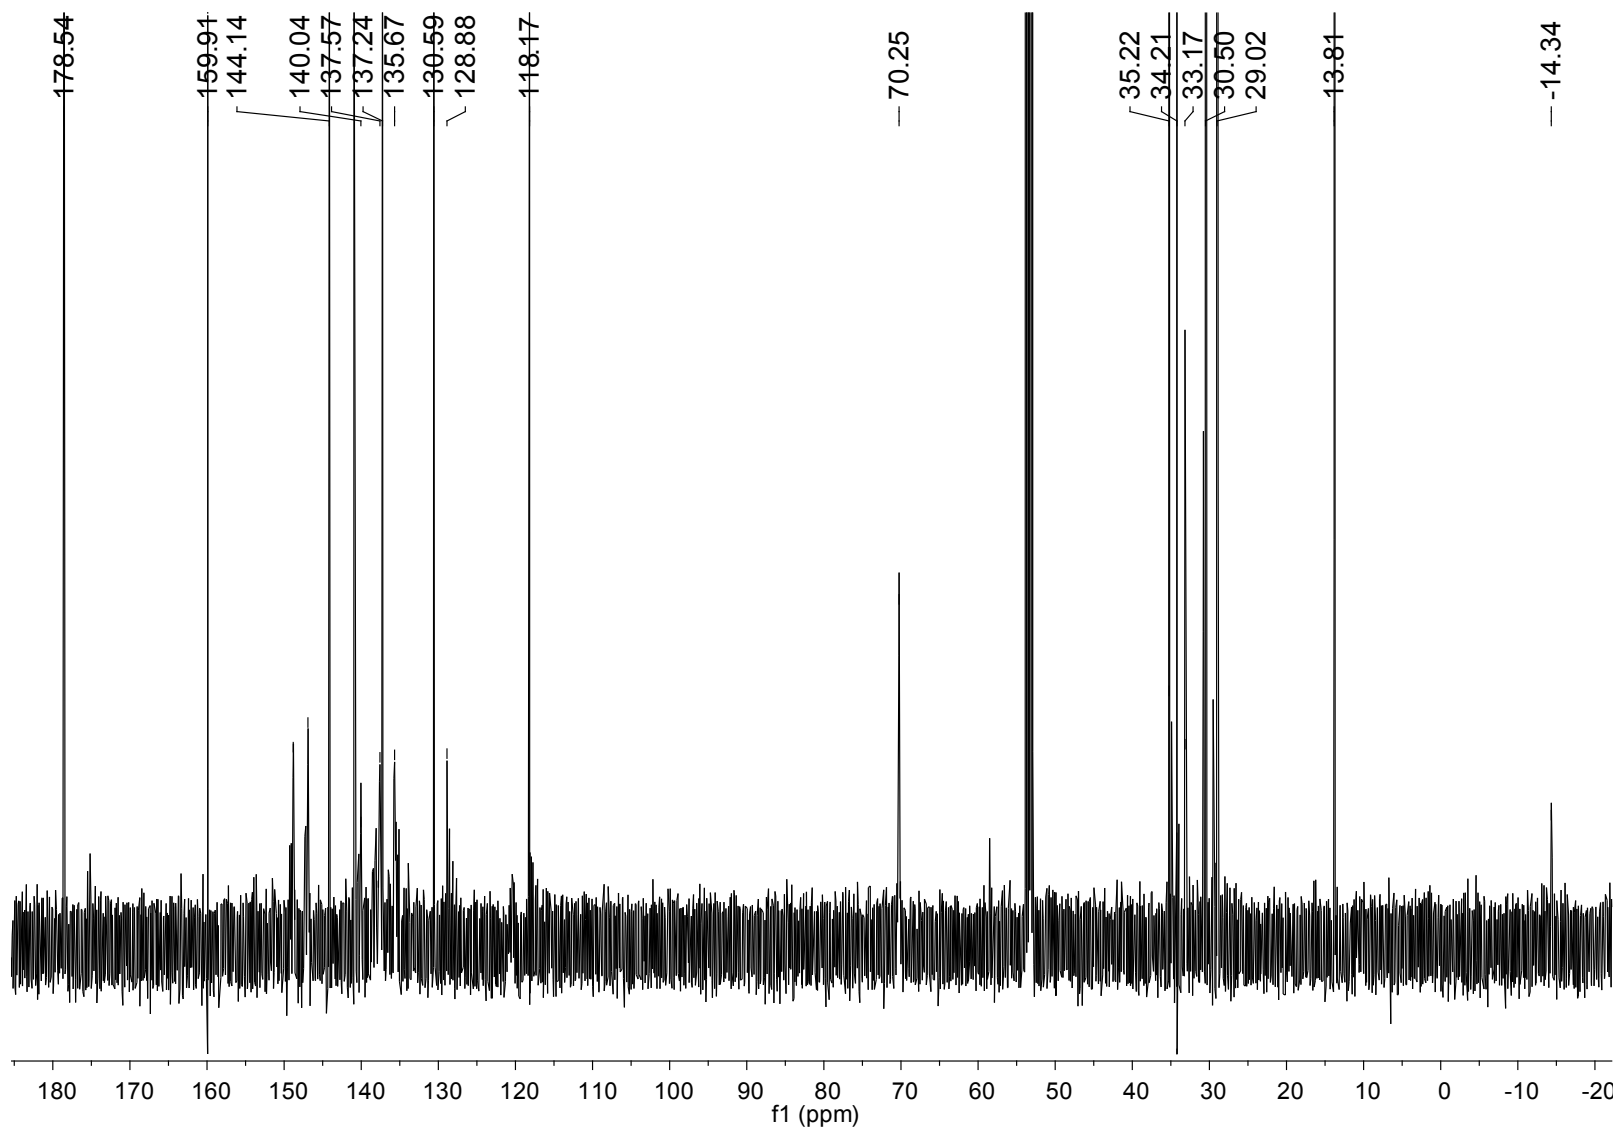

**Figure S12.**  $^{13}\text{C}\{^1\text{H}\}$  NMR spectrum (125 MHz,  $\text{CD}_2\text{Cl}_2$ , 298 K) of  $[\mathbf{3a}\cdot(\text{OEt}_2)_2]^{2+}[(\text{Me})\text{B}(\text{C}_6\text{F}_5)_3]^-[\text{H}_2\text{N}\{\text{B}(\text{C}_6\text{F}_5)_3\}_2]^-$ .

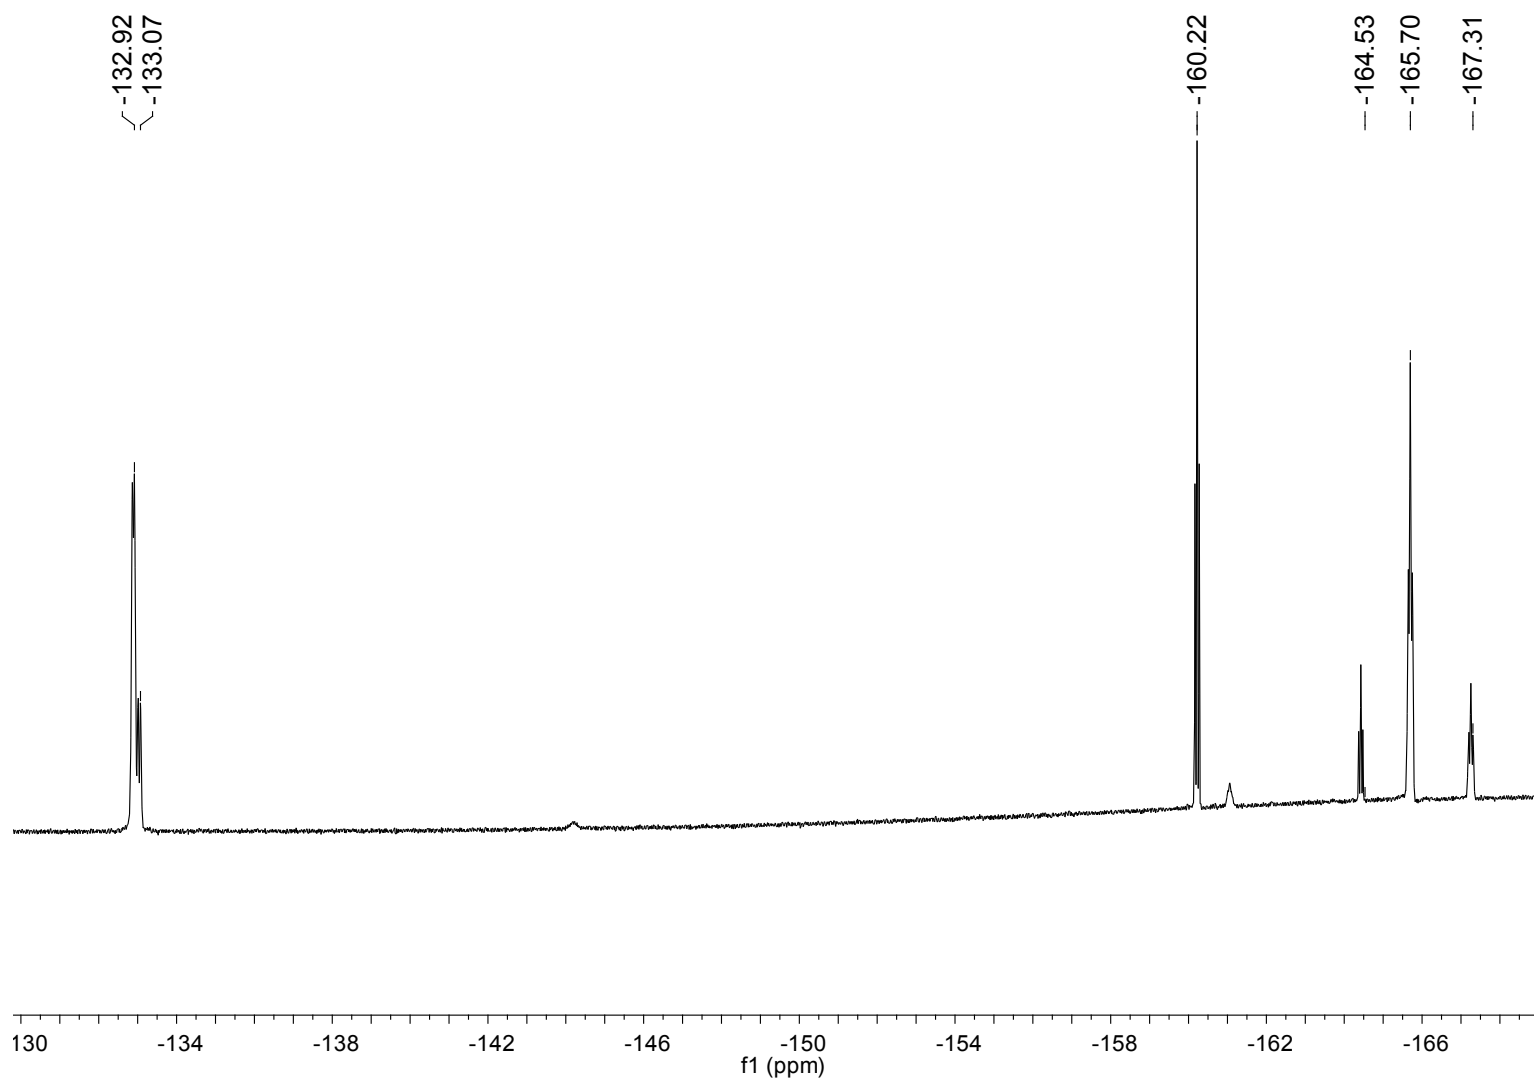

**Figure S13.**  $^{19}\text{F}\{^1\text{H}\}$  NMR spectrum (376 MHz,  $\text{CD}_2\text{Cl}_2$ , 298 K) of  $[\mathbf{3a}\cdot(\text{OEt}_2)_2]^{2+}[(\text{Me})\text{B}(\text{C}_6\text{F}_5)_3]^-[\text{H}_2\text{N}\{\text{B}(\text{C}_6\text{F}_5)_3\}_2]^-$ .

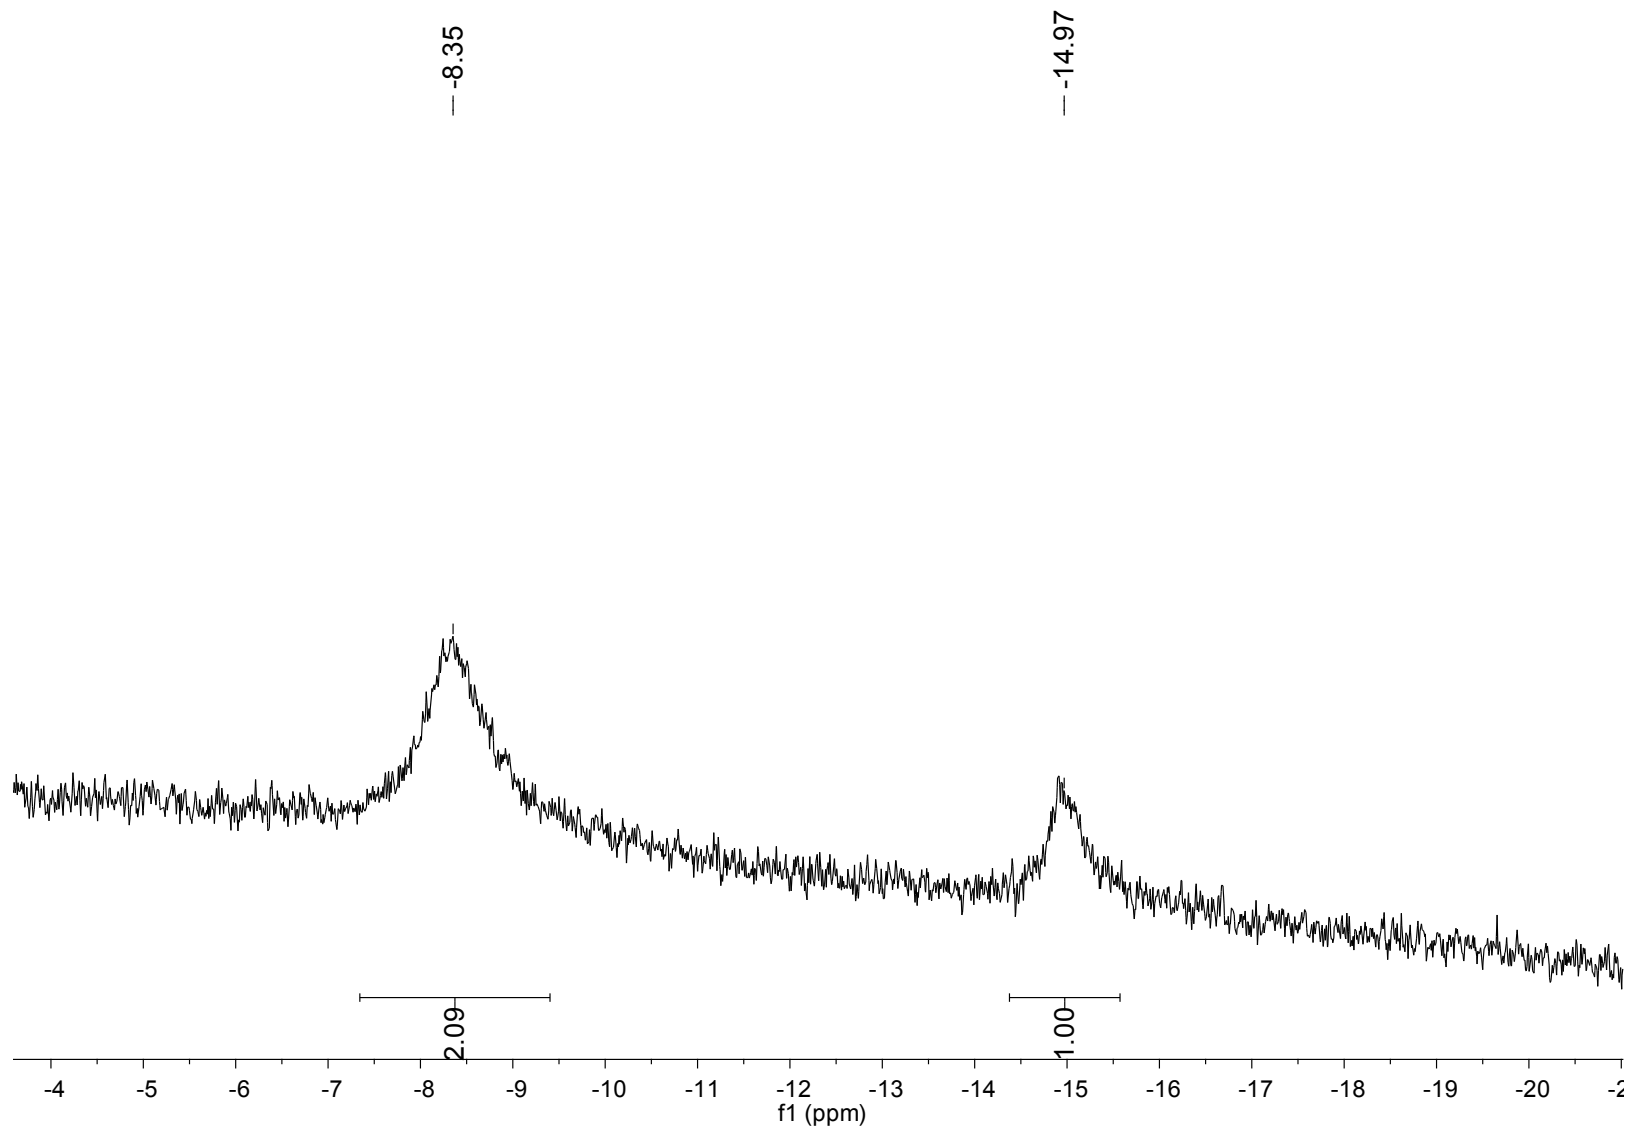

**Figure S14.**  $^{11}\text{B}\{^1\text{H}\}$  NMR spectrum (128 MHz,  $\text{CD}_2\text{Cl}_2$ , 298 K) of  $[\mathbf{3a}\cdot(\text{OEt}_2)_2]^{2+}[(\text{Me})\text{B}(\text{C}_6\text{F}_5)_3]^-[\text{H}_2\text{N}\{\text{B}(\text{C}_6\text{F}_5)_3\}_2]^-$ .

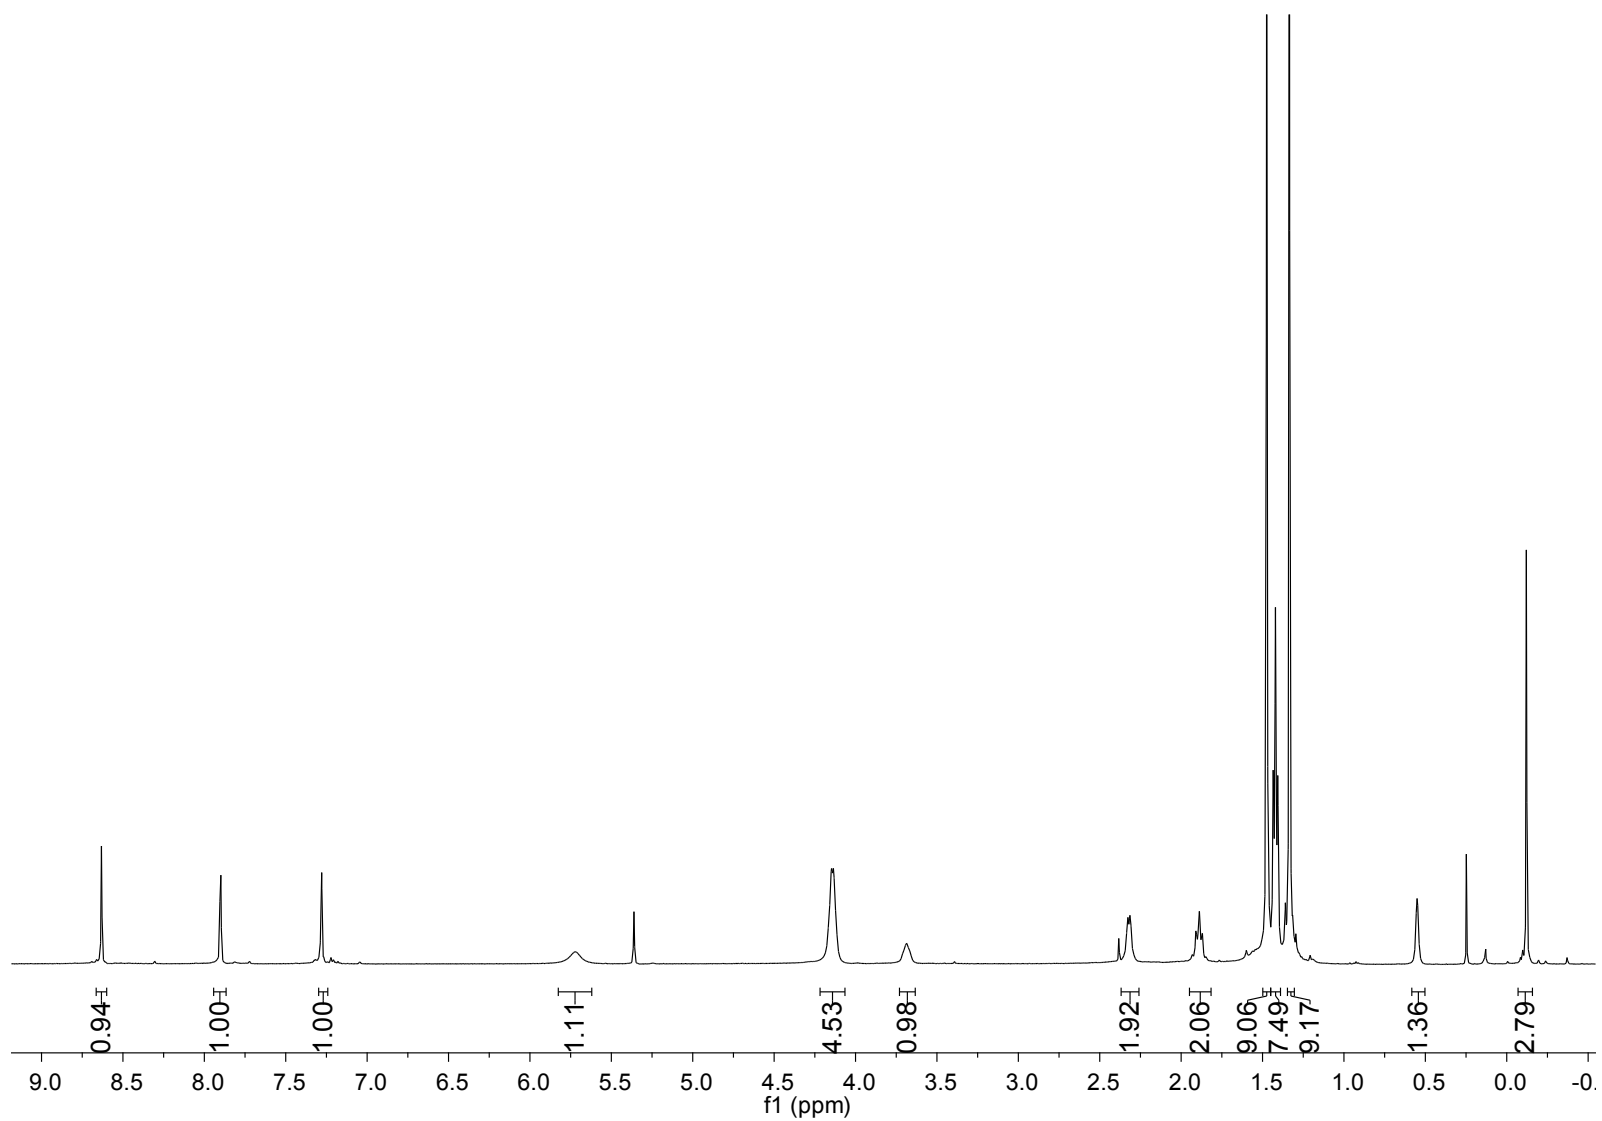

**Figure S15.**  $^1\text{H}$  NMR spectrum (500 MHz,  $\text{CD}_2\text{Cl}_2$ , 298 K) of  $[\mathbf{3b}\cdot(\text{OEt}_2)_2]^{2+}[(\text{Me})\text{B}(\text{C}_6\text{F}_5)_3]^-[\text{H}_2\text{N}\{\text{B}(\text{C}_6\text{F}_5)_3\}_2]^-$ .



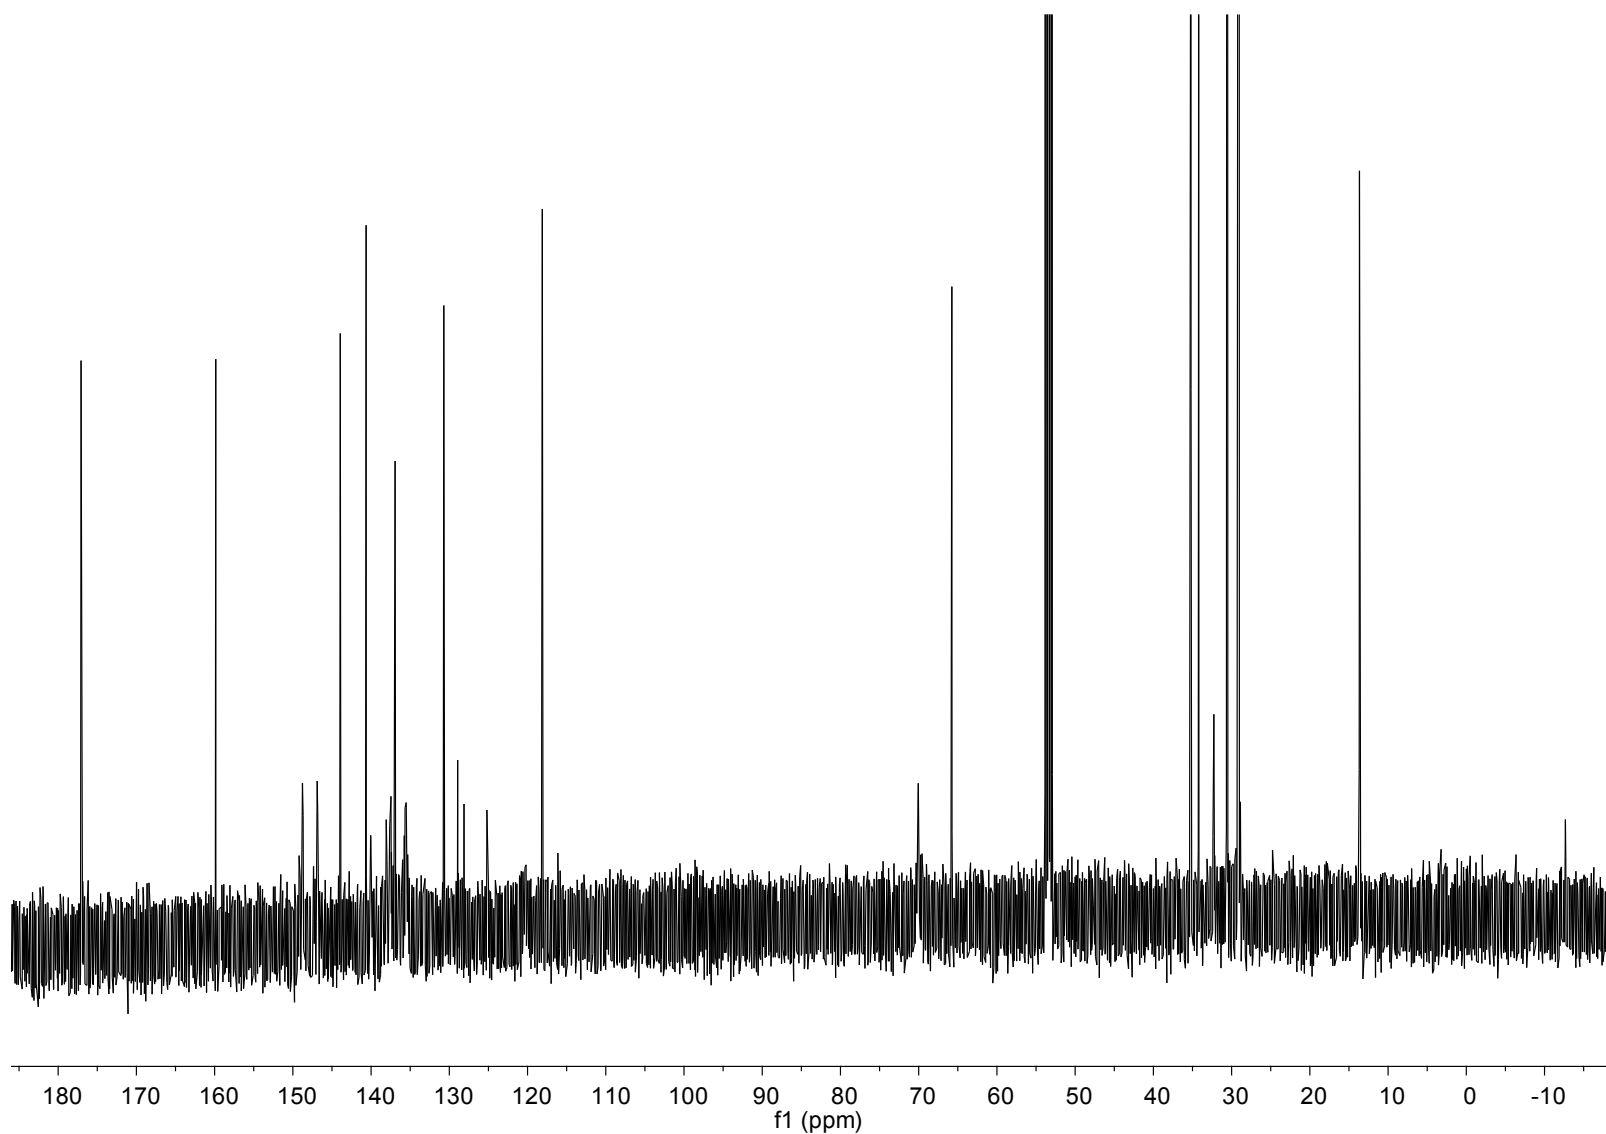

**Figure S16.**  $^{13}\text{C}$  NMR spectrum (125 MHz,  $\text{CD}_2\text{Cl}_2$ , 298 K) of  $[\mathbf{3b}\cdot(\text{OEt}_2)_2]^{2+}[(\text{Me})\text{B}(\text{C}_6\text{F}_5)_3]^-[\text{H}_2\text{N}\{\text{B}(\text{C}_6\text{F}_5)_3\}_2]^-$ .

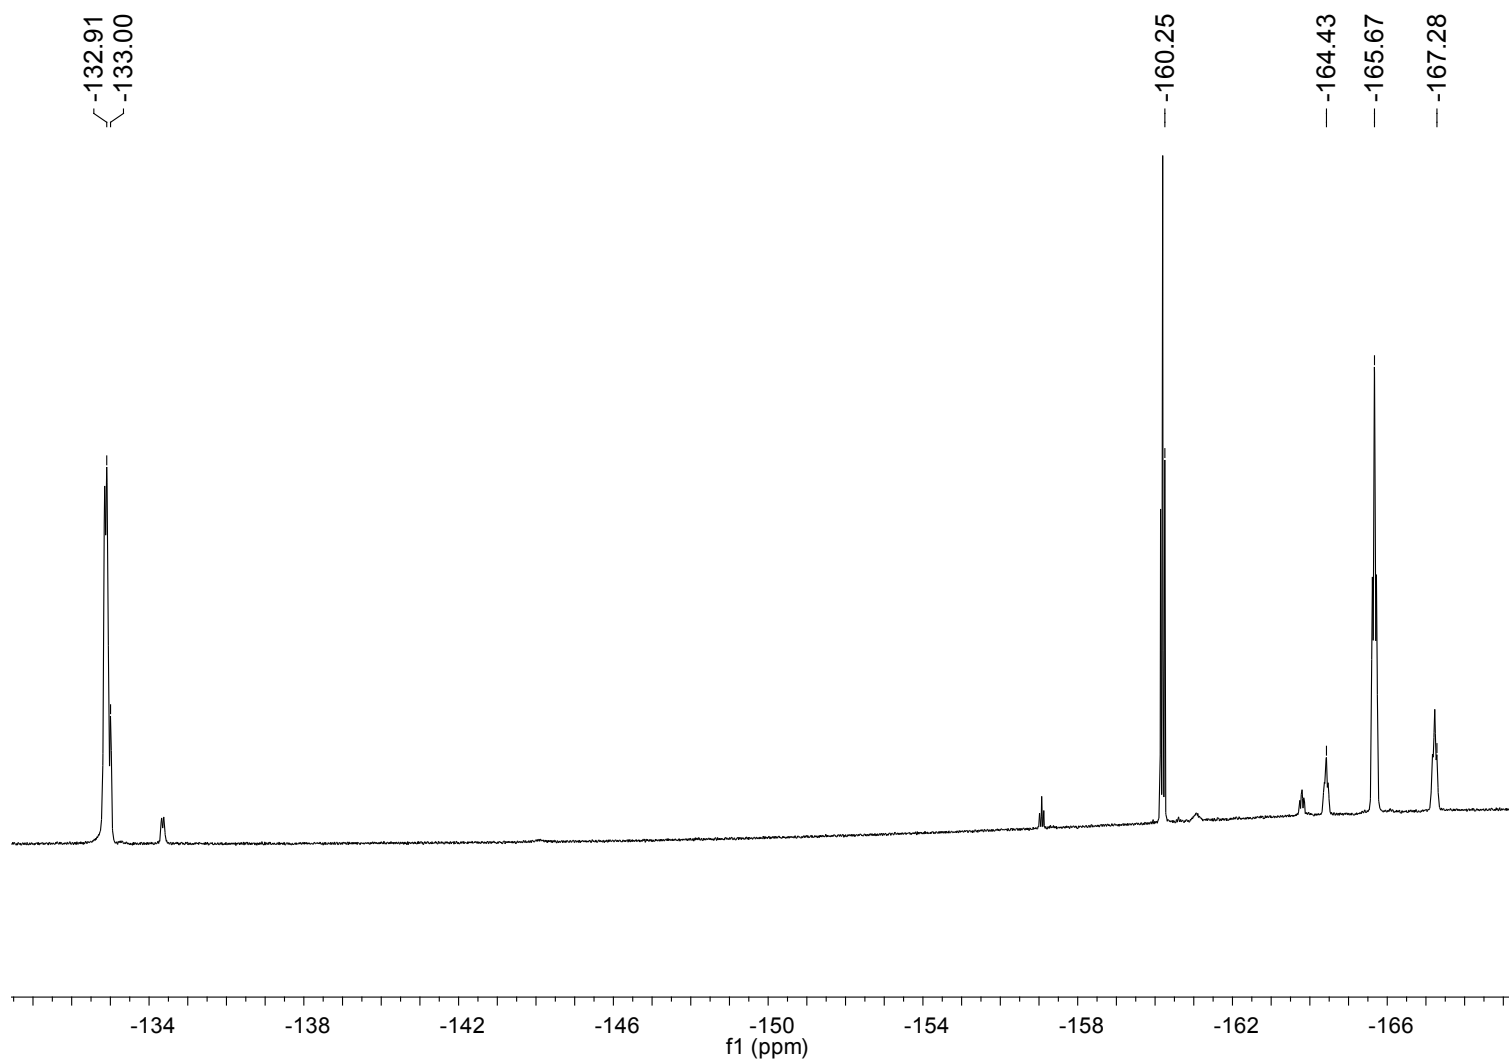

**Figure S17.**  $^{19}\text{F}\{^1\text{H}\}$  NMR spectrum (376 MHz,  $\text{CD}_2\text{Cl}_2$ , 298 K) of  $[\mathbf{3b}\cdot(\text{OEt}_2)_2]^{2+}[(\text{Me})\text{B}(\text{C}_6\text{F}_5)_3]^-[\text{H}_2\text{N}\{\text{B}(\text{C}_6\text{F}_5)_3\}_2]^-$ .

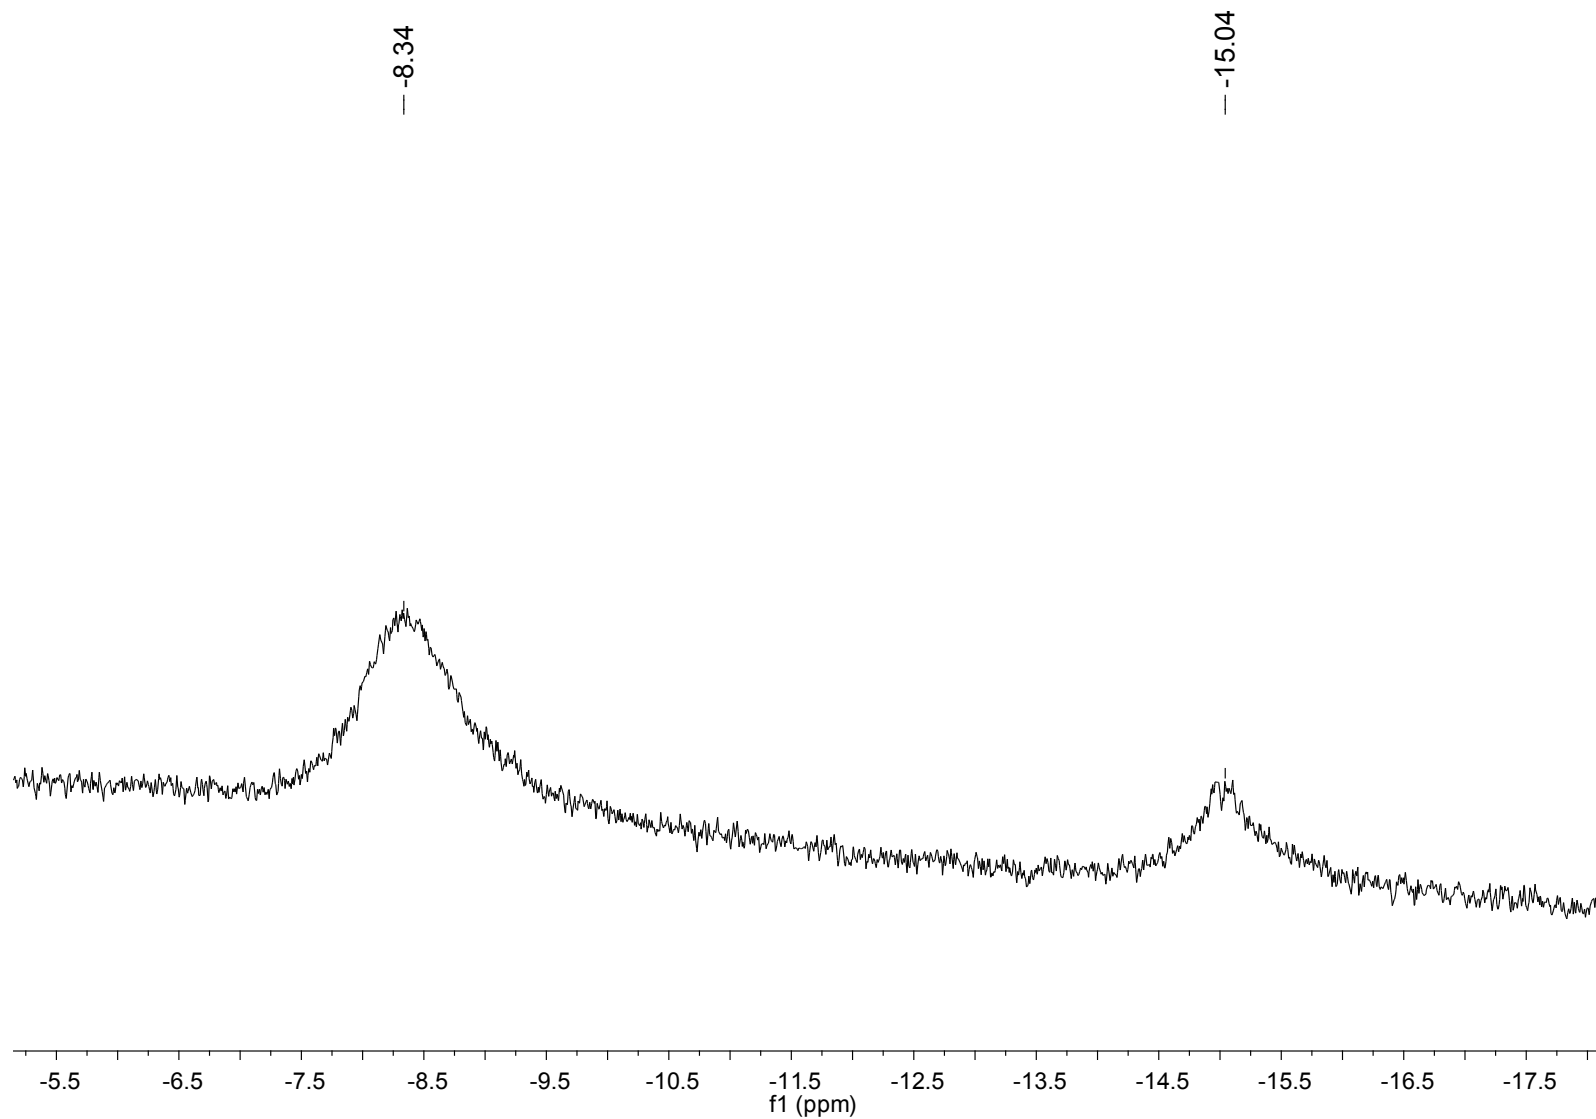

**Figure S18.**  $^{11}\text{B}\{^1\text{H}\}$  NMR spectrum (128 MHz,  $\text{CD}_2\text{Cl}_2$ , 298 K) of  $[\mathbf{3b}\cdot(\text{OEt}_2)_2]^{2+}[(\text{Me})\text{B}(\text{C}_6\text{F}_5)_3]^-[\text{H}_2\text{N}\{\text{B}(\text{C}_6\text{F}_5)_3\}_2]^-$ .

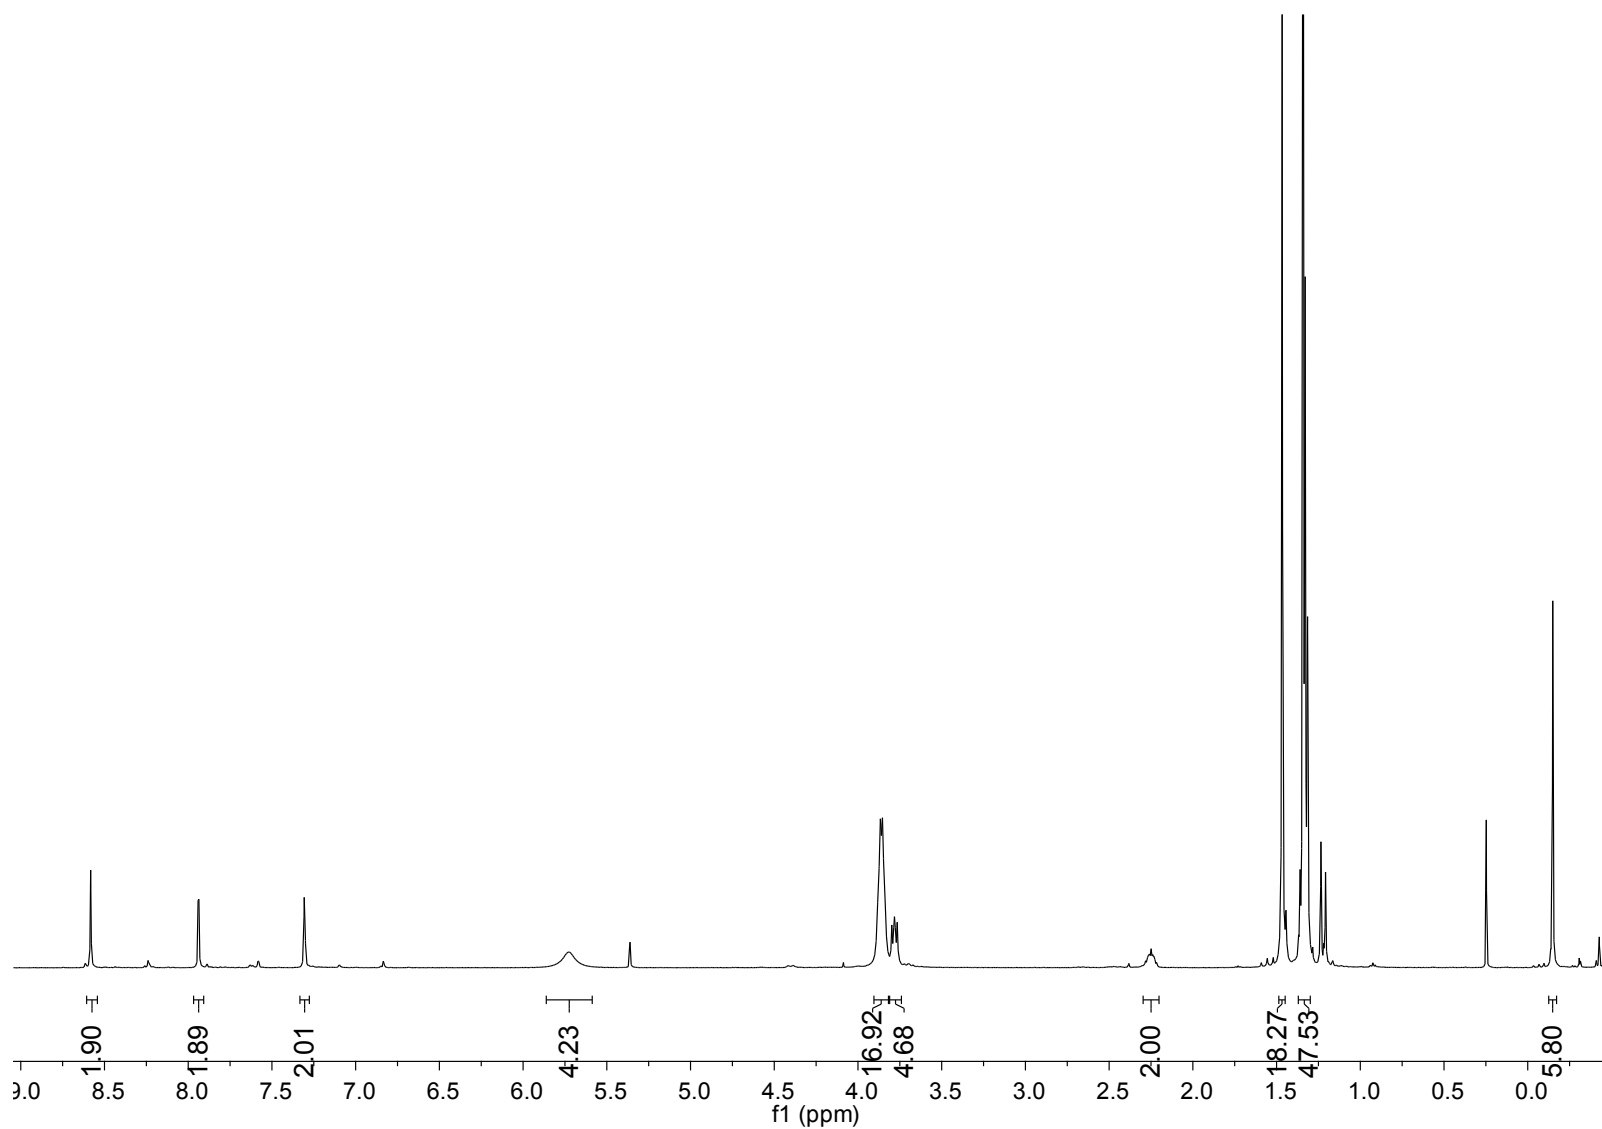

**Figure S19.**  $^1\text{H}$  NMR spectrum (500 MHz,  $\text{CD}_2\text{Cl}_2$ , 298 K) of  $[\mathbf{3a}\cdot(\text{OEt}_2)_2]^{2+}[\text{H}_2\text{N}\{\text{B}(\text{C}_6\text{F}_5)_3\}_2]^{2-}$ .

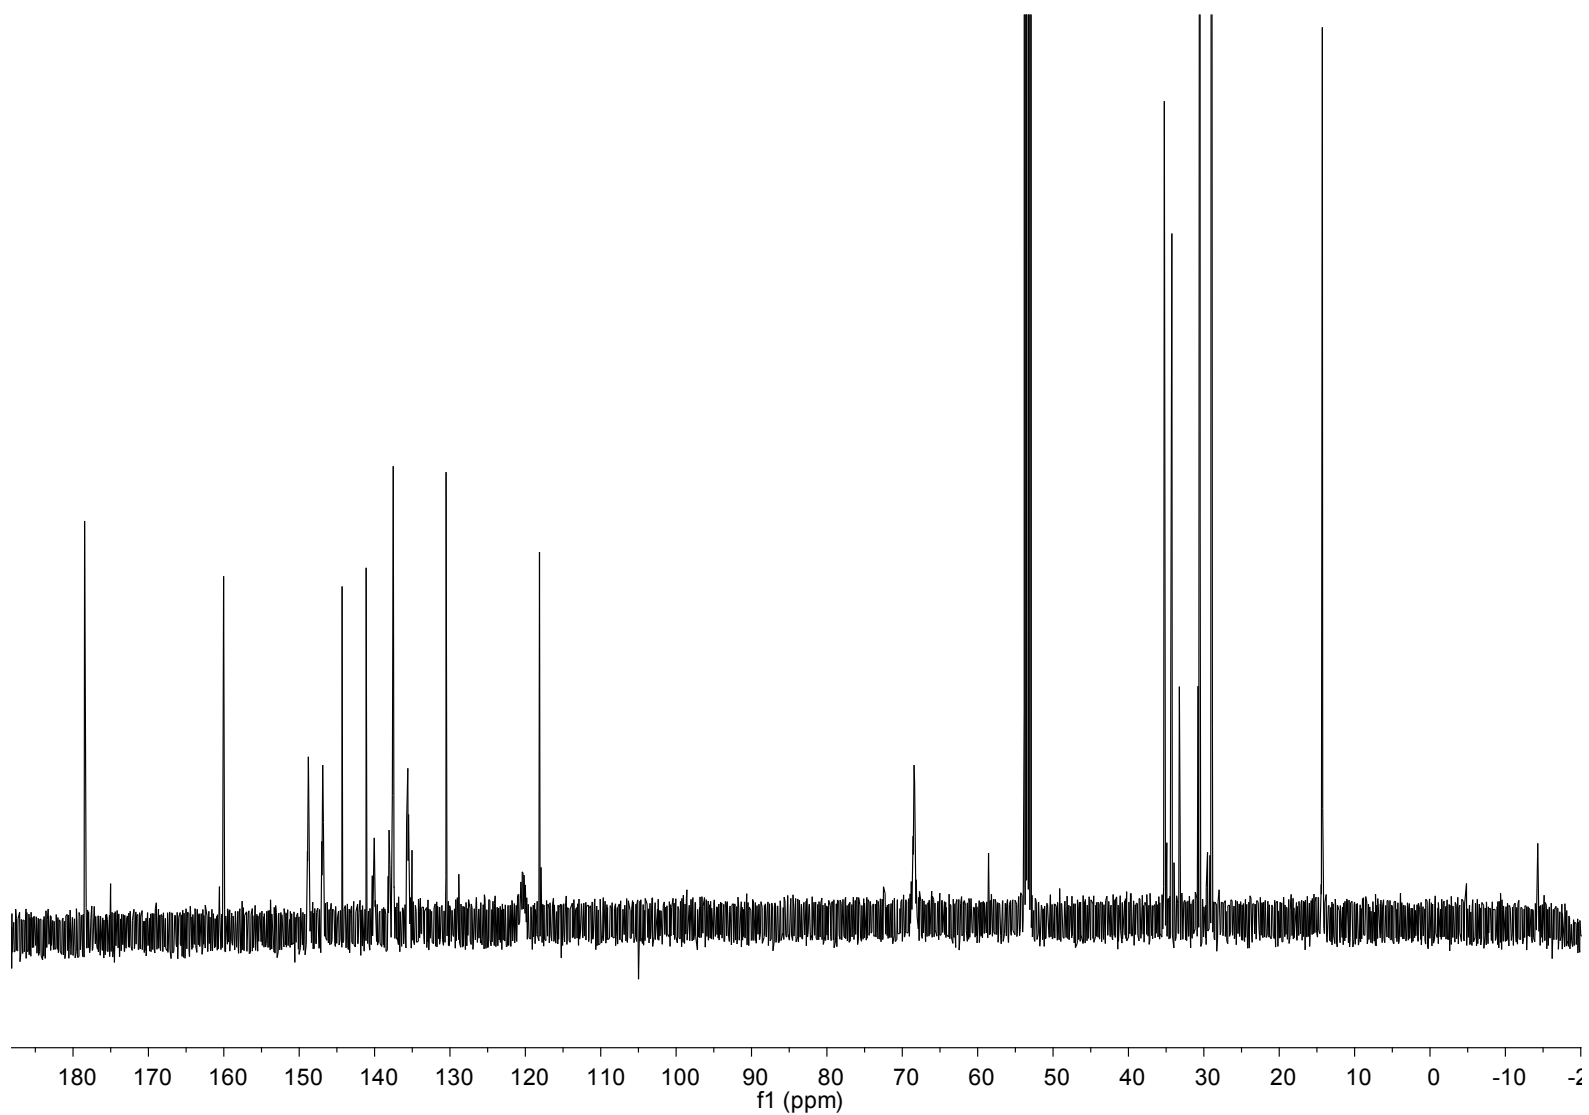

**Figure S20.**  $^{13}\text{C}\{^1\text{H}\}$  NMR spectrum (125 MHz,  $\text{CD}_2\text{Cl}_2$ , 298 K) of  $[\mathbf{3a}\cdot(\text{OEt})_2]^{2+}[\text{H}_2\text{N}\{\text{B}(\text{C}_6\text{F}_5)_3\}_2]^{-2}$ .

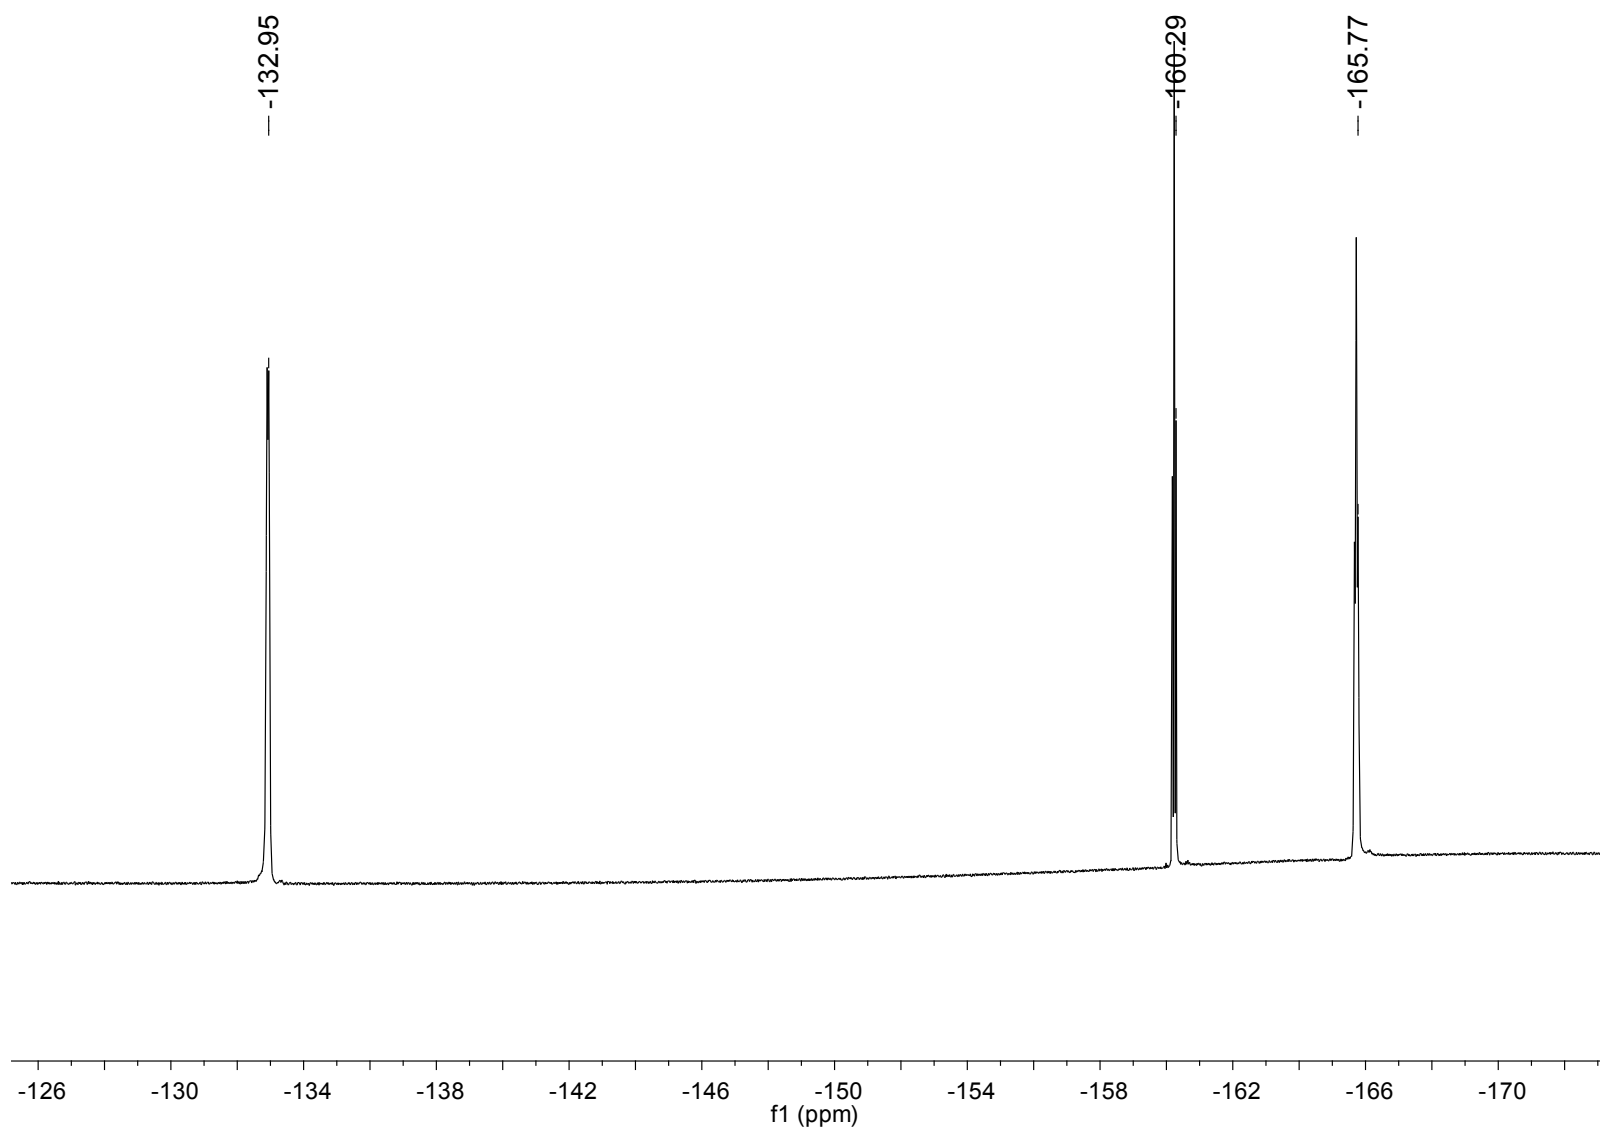

**Figure S21.**  $^{19}\text{F}\{^1\text{H}\}$  NMR spectrum (376 MHz,  $\text{CD}_2\text{Cl}_2$ , 298 K) of  $[\mathbf{3a}\cdot(\text{OEt}_2)_2]^{2+}[\text{H}_2\text{N}\{\text{B}(\text{C}_6\text{F}_5)_3\}_2]^{-2}$ .

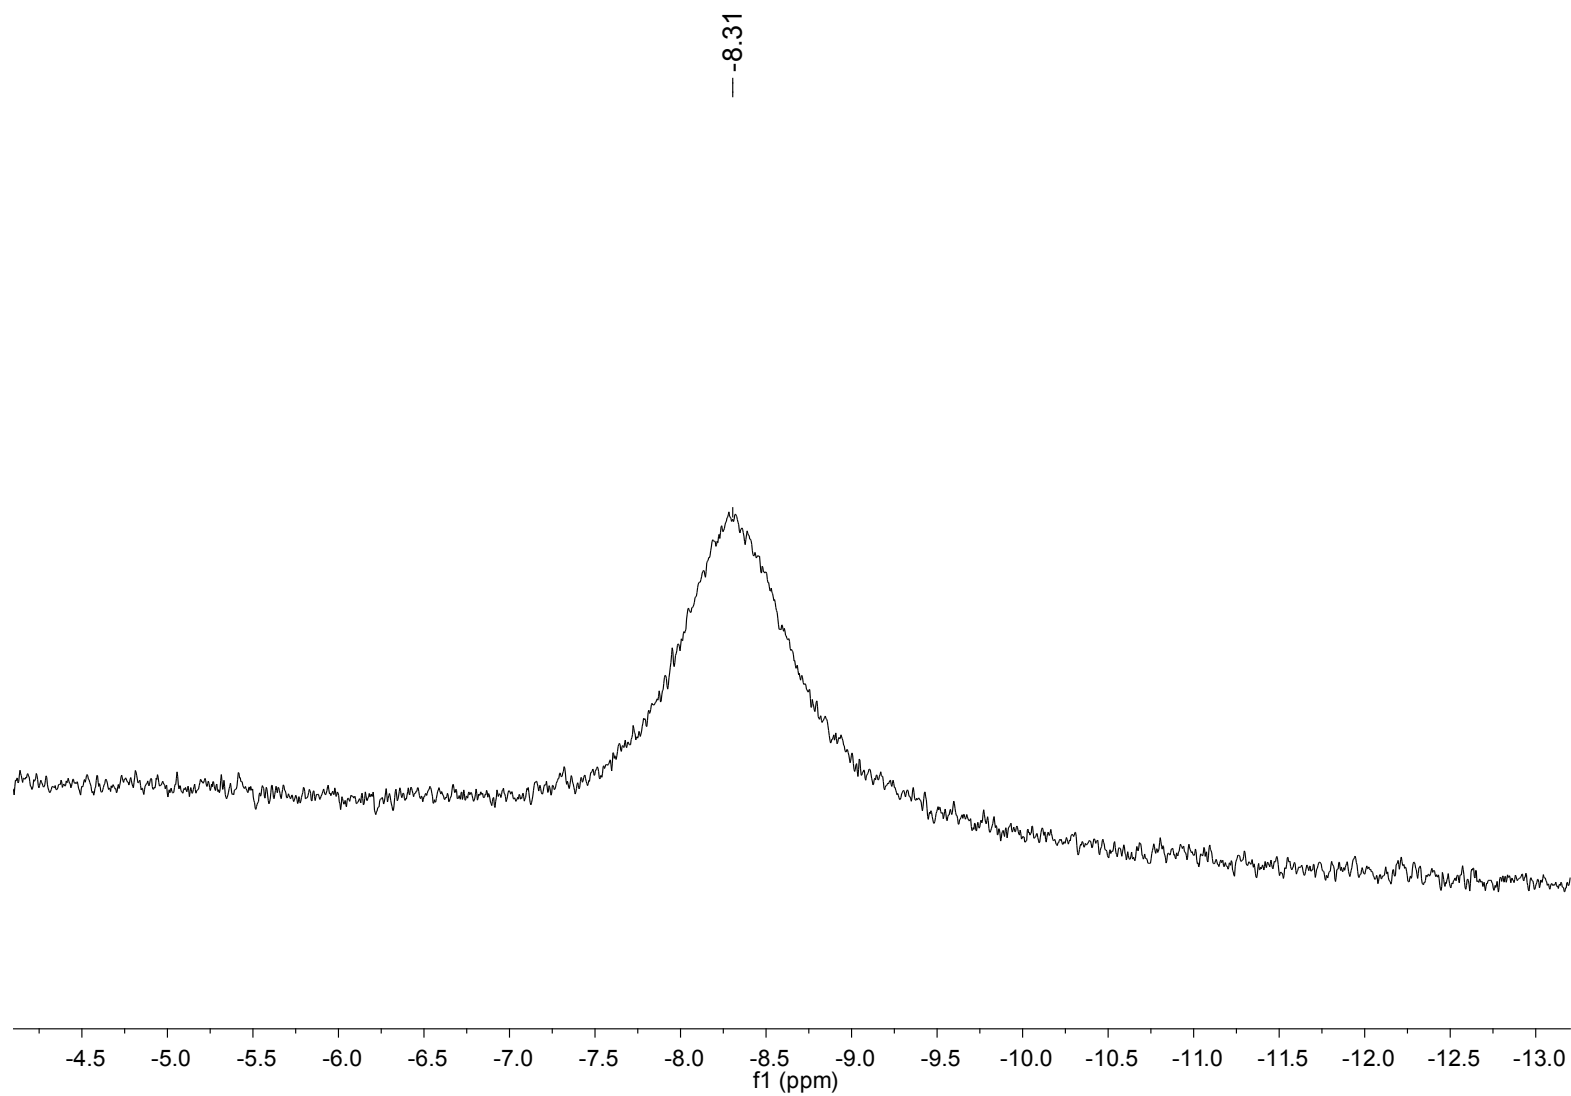

**Figure S22.**  $^{11}\text{B}\{^1\text{H}\}$  NMR spectrum (128 MHz,  $\text{CD}_2\text{Cl}_2$ , 298 K) of  $[\mathbf{3a}\cdot(\text{OEt})_2]^{2+}[\text{H}_2\text{N}\{\text{B}(\text{C}_6\text{F}_5)_3\}_2]^{-2}$ .

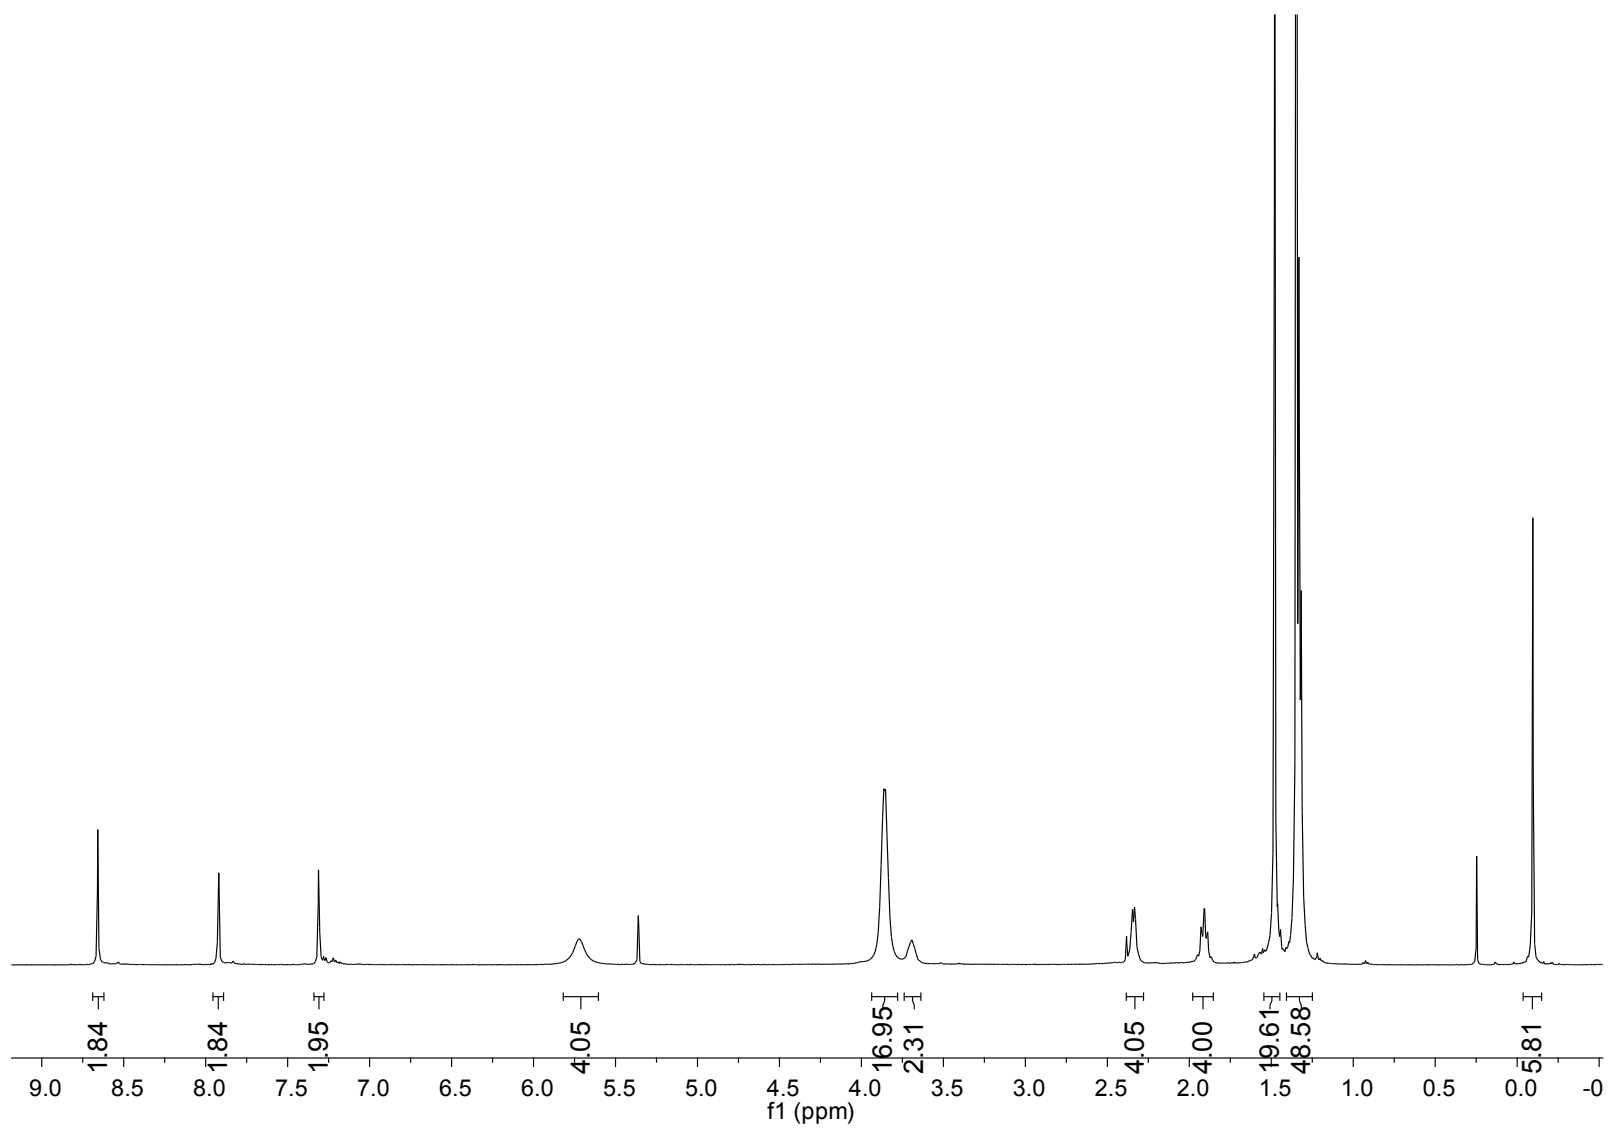

**Figure S23.** <sup>1</sup>H NMR spectrum (500 MHz, CD<sub>2</sub>Cl<sub>2</sub>, 298 K) of **[3b·(OEt<sub>2</sub>)<sub>2</sub>]<sup>2+</sup>[H<sub>2</sub>N{B(C<sub>6</sub>F<sub>5</sub>)<sub>3</sub>]<sub>2</sub>]<sup>-2</sup>.**



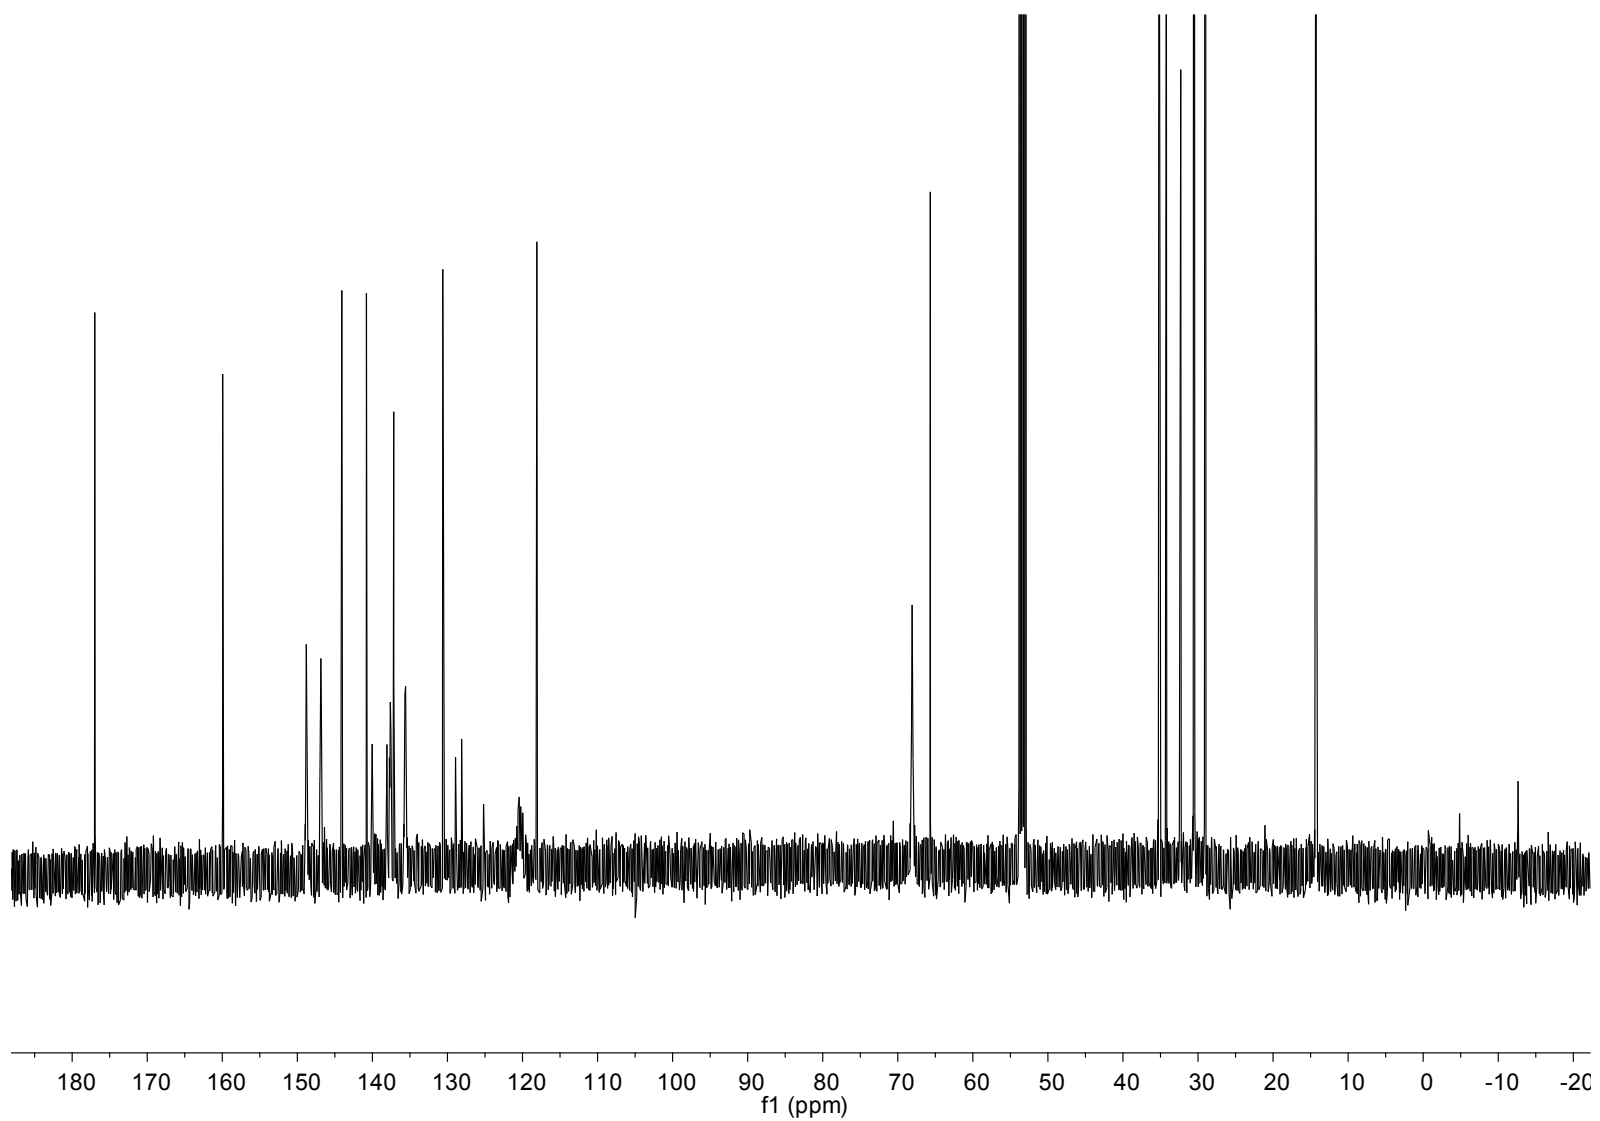

**Figure S24.**  $^{13}\text{C}\{^1\text{H}\}$  NMR spectrum (125 MHz,  $\text{CD}_2\text{Cl}_2$ , 298 K) of  $[\mathbf{3b}\cdot(\text{OEt}_2)_2]^{2+}[\text{H}_2\text{N}\{\text{B}(\text{C}_6\text{F}_5)_3\}_2]^{-2}$ .

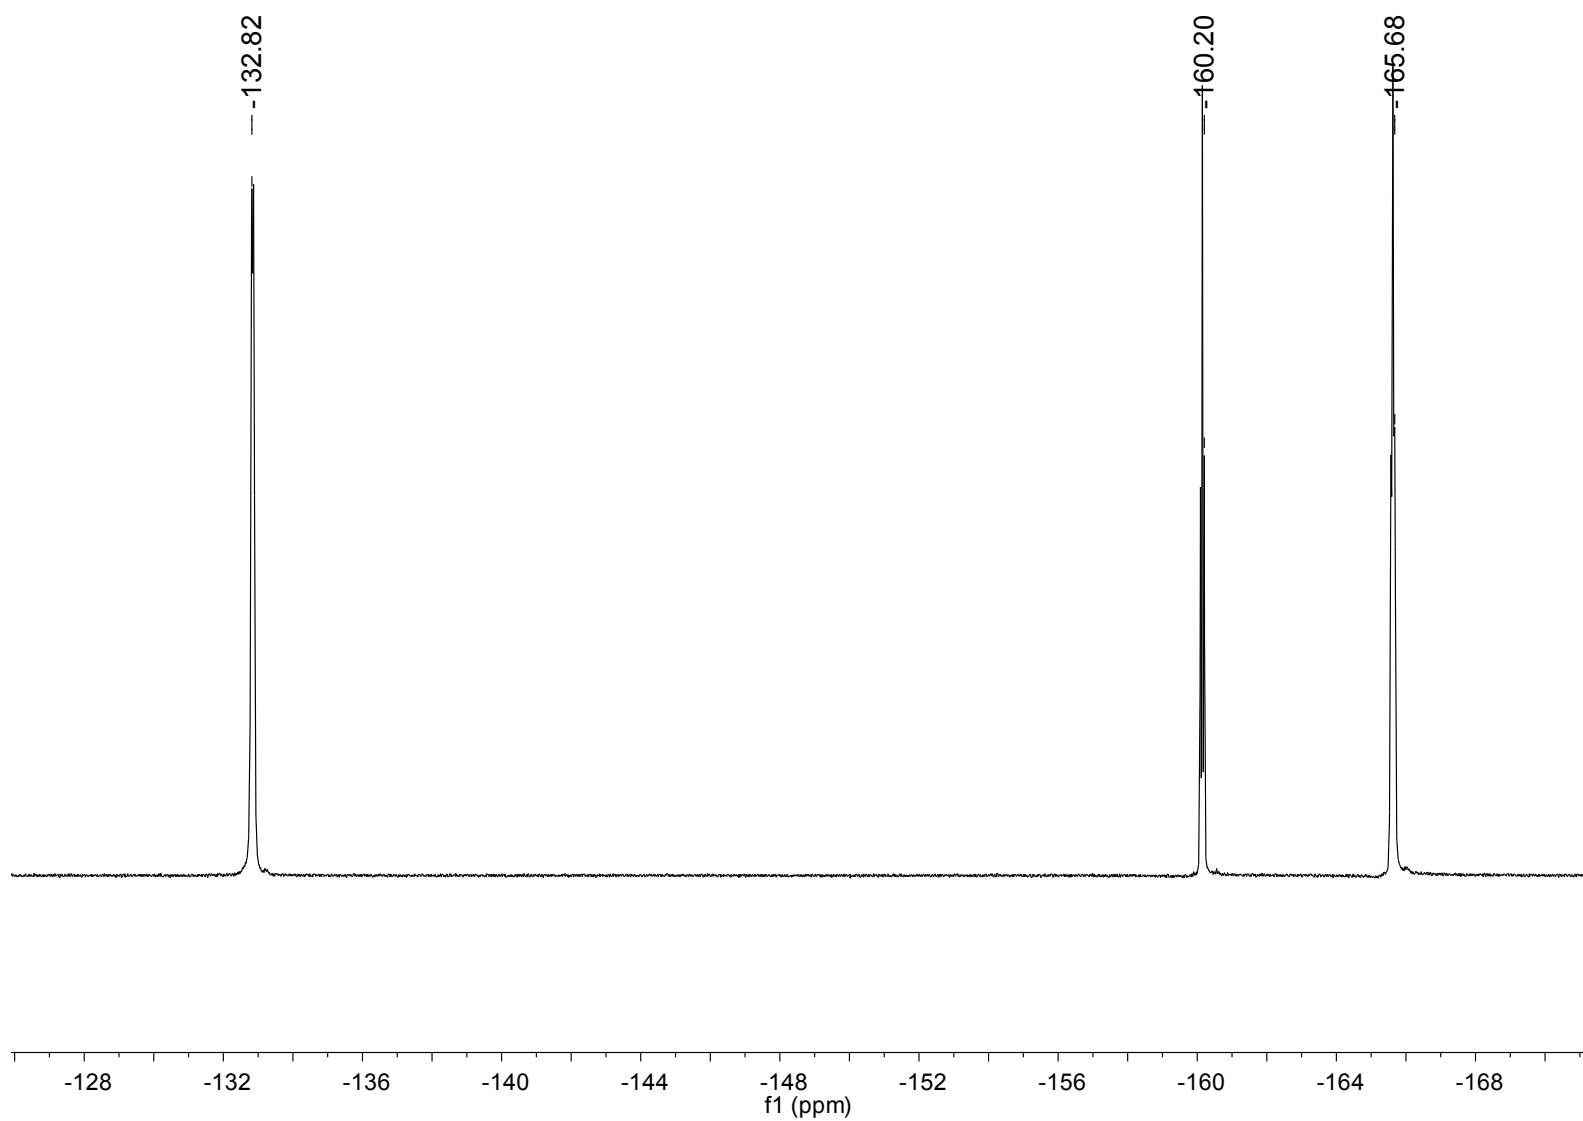

**Figure S25.**  $^{19}\text{F}\{^1\text{H}\}$  NMR spectrum (376 MHz,  $\text{CD}_2\text{Cl}_2$ , 298 K) of  $[\mathbf{3b}\cdot(\text{OEt}_2)_2]^{2+}[\text{H}_2\text{N}\{\text{B}(\text{C}_6\text{F}_5)_3\}_2]^{-2}$ .

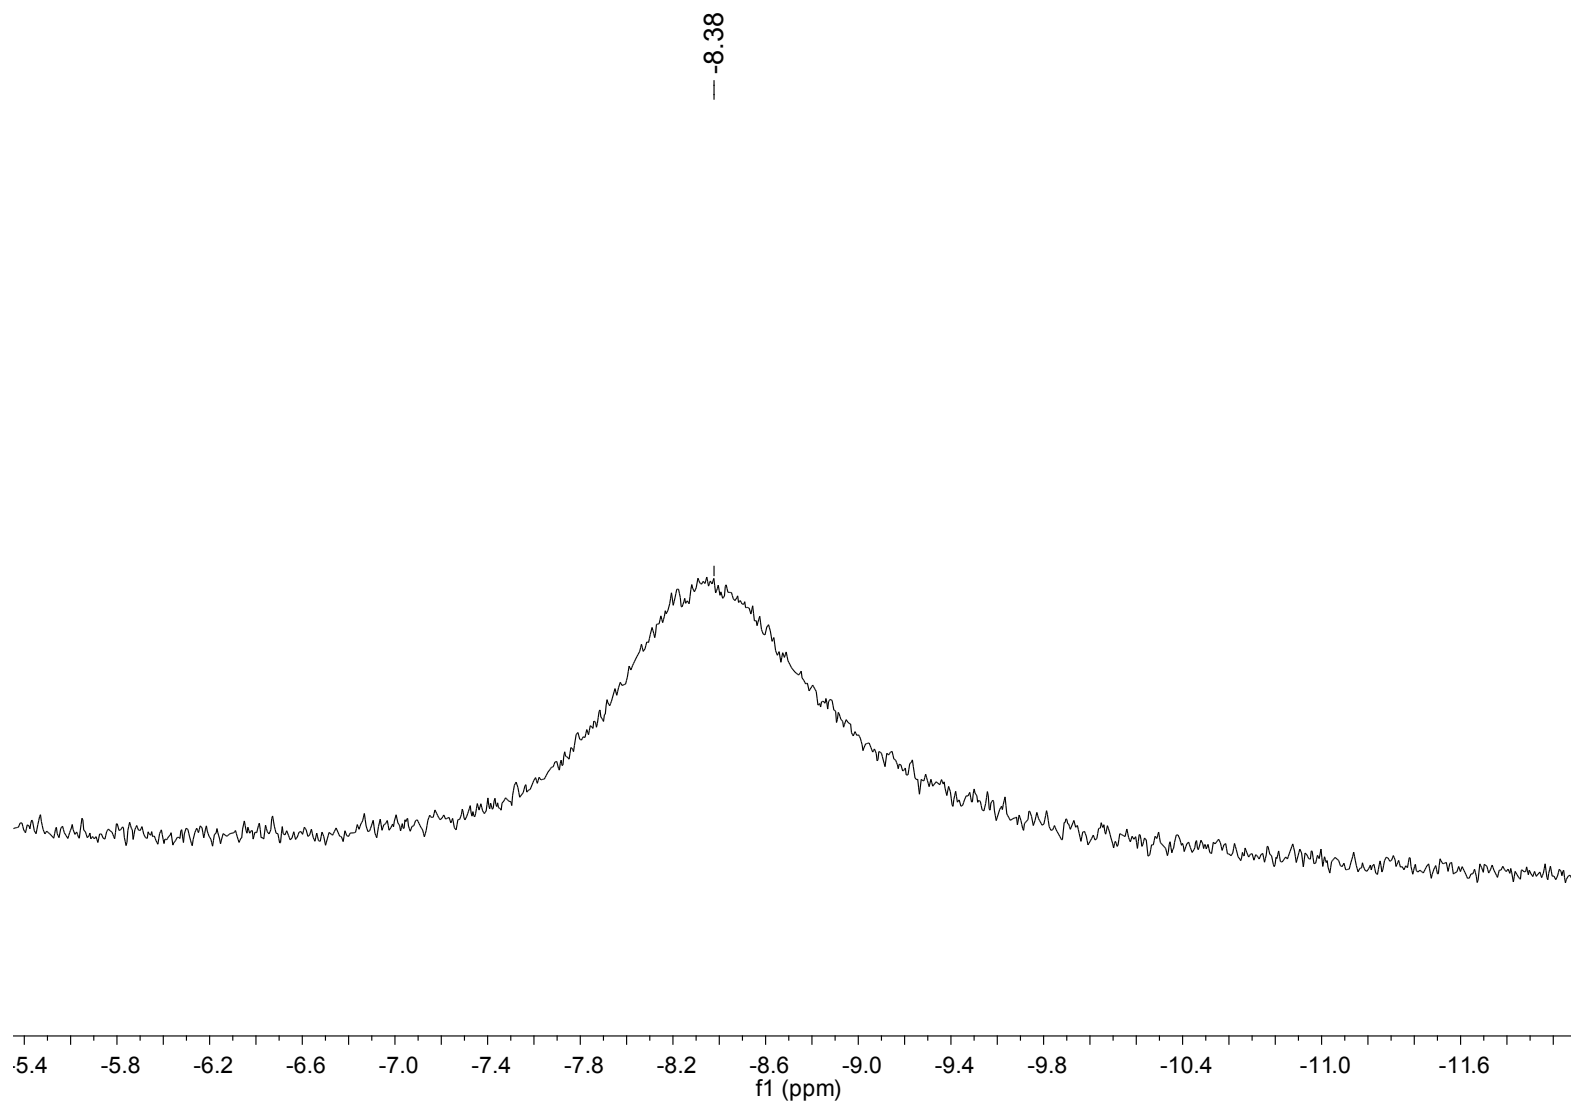

**Figure S26.**  $^{11}\text{B}\{^1\text{H}\}$  NMR spectrum (128 MHz,  $\text{CD}_2\text{Cl}_2$ , 298 K) of  $[\mathbf{3b}\cdot(\text{OEt}_2)_2]^{2+}[\text{H}_2\text{N}\{\text{B}(\text{C}_6\text{F}_5)_3\}_2]^{-2}$ .

**Table S1.** Summary of Crystal and Refinement Data for Complexes **4a** and **[3b·(OEt<sub>2</sub>)<sub>2</sub>]<sup>2+</sup>[H<sub>2</sub>N{B(C<sub>6</sub>F<sub>5</sub>)<sub>3</sub>]<sub>2</sub>]<sup>-2</sup>.**

|                                                         | <b>4a</b>                                                                      | <b>[3b·(OEt<sub>2</sub>)<sub>2</sub>]<sup>2+</sup>[H<sub>2</sub>N{B(C<sub>6</sub>F<sub>5</sub>)<sub>3</sub>]<sub>2</sub>]<sup>-2</sup></b>     |
|---------------------------------------------------------|--------------------------------------------------------------------------------|------------------------------------------------------------------------------------------------------------------------------------------------|
| Empirical formula                                       | C <sub>39</sub> H <sub>48</sub> AlF <sub>5</sub> N <sub>2</sub> O <sub>2</sub> | C <sub>81.33</sub> H <sub>60</sub> Al <sub>1.33</sub> B <sub>2.67</sub> Cl <sub>5.33</sub> F <sub>40</sub> N <sub>2.67</sub> O <sub>2.67</sub> |
| Formula weight                                          | 698.77                                                                         | 2131.18                                                                                                                                        |
| Crystal system                                          | monoclinic                                                                     | monoclinic                                                                                                                                     |
| Space group                                             | C 2 / c                                                                        | P 1 2 <sub>1</sub> / c 1                                                                                                                       |
| <i>a</i> , Å                                            | 37.742(7)                                                                      | 21.0007(15)                                                                                                                                    |
| <i>b</i> , Å                                            | 10.4163(19)                                                                    | 19.4971(14)                                                                                                                                    |
| <i>c</i> , Å                                            | 21.203(3)                                                                      | 19.4648(17)                                                                                                                                    |
| <i>α</i> , deg                                          | 90                                                                             | 90                                                                                                                                             |
| <i>β</i> , deg                                          | 106.565(7)                                                                     | 113.882(4)                                                                                                                                     |
| <i>γ</i> , deg                                          | 90                                                                             | 90                                                                                                                                             |
| Volume, Å <sup>3</sup>                                  | 7990(2)                                                                        | 7287.5(10)                                                                                                                                     |
| <i>Z</i>                                                | 8                                                                              | 3                                                                                                                                              |
| Density, g.m <sup>-3</sup>                              | 1.162                                                                          | 1.457                                                                                                                                          |
| Abs. coeff., mm <sup>-1</sup>                           | 0.107                                                                          | 0.293                                                                                                                                          |
| F(000)                                                  | 2960                                                                           | 3208                                                                                                                                           |
| Crystal size, mm                                        | 0.36 x 0.26 x 0.13                                                             | 0.580 x 0.410 x 0.200                                                                                                                          |
| <i>θ</i> range, deg                                     | 2.94 to 27.48                                                                  | 2.955 to 27.424                                                                                                                                |
| Limiting indices                                        | -48 ≤ <i>h</i> ≤ 48, -11 ≤ <i>k</i> ≤ 13,<br>-27 ≤ <i>l</i> ≤ 24               | -23 ≤ <i>h</i> ≤ 27, -25 ≤ <i>h</i> ≤ 24, -25 ≤ <i>h</i><br>≤ 25                                                                               |
| Reflec. Collected                                       | 26825                                                                          | 38629                                                                                                                                          |
| Refle. Unique [ <i>I</i> > 2σ( <i>I</i> )]              | 9058                                                                           | 16588                                                                                                                                          |
| Data/restraints/param.                                  | 9058 / 15 / 455                                                                | 16588 / 4 / 881                                                                                                                                |
| Goodness-of-fit on F <sup>2</sup>                       | 0.763                                                                          | 0.965                                                                                                                                          |
| R <sub>1</sub> [ <i>I</i> > 2σ( <i>I</i> )] (all data)  | 0.0797                                                                         | 0.1298                                                                                                                                         |
| wR <sub>2</sub> [ <i>I</i> > 2σ( <i>I</i> )] (all data) | 0.1918                                                                         | 0.3422                                                                                                                                         |
| Largest diff. e.Å <sup>-3</sup>                         | 0.344 and -0.287                                                               | 1.859 and -1.115                                                                                                                               |
